# Supplementary material for: Australia’s awareness of cardiac arrest and rates of CPR training: results from the Heart Foundation's HeartWatch survey
Source: PubMed Central journal article supplement — BMJ Open. 2020 Jan 6;10(1):e033722. doi: 10.1136/bmjopen-2019-033722 (PMC6955479; doi:10.1136/bmjopen-2019-033722), 2020-01-06
Supplement: bmjopen-2019-033722.draft_revisions.pdf [file bmjopen-2019-033722.draft_revisions.pdf]

# BMJ Open

BMJ Open is committed to open peer review. As part of this commitment we make the peer review history of every article we publish publicly available.

When an article is published we post the peer reviewers' comments and the authors' responses online. We also post the versions of the paper that were used during peer review. These are the versions that the peer review comments apply to.

The versions of the paper that follow are the versions that were submitted during the peer review process. They are not the versions of record or the final published versions. They should not be cited or distributed as the published version of this manuscript.

BMJ Open is an open access journal and the full, final, typeset and author-corrected version of record of the manuscript is available on our site with no access controls, subscription charges or pay-per-view fees (<http://bmjopen.bmj.com>).

If you have any questions on BMJ Open's open peer review process please email [editorial.bmjopen@bmj.com](mailto:editorial.bmjopen@bmj.com)

# BMJ Open

## Australia's awareness of cardiac arrest and rates of CPR training: results from the Heart Foundations' Heart Watch Survey.

|                               |                                                                                                                                                                                                                                                                                                                                |
|-------------------------------|--------------------------------------------------------------------------------------------------------------------------------------------------------------------------------------------------------------------------------------------------------------------------------------------------------------------------------|
| Journal:                      | <i>BMJ Open</i>                                                                                                                                                                                                                                                                                                                |
| Manuscript ID                 | bmjopen-2019-033722                                                                                                                                                                                                                                                                                                            |
| Article Type:                 | Original research                                                                                                                                                                                                                                                                                                              |
| Date Submitted by the Author: | 25-Aug-2019                                                                                                                                                                                                                                                                                                                    |
| Complete List of Authors:     | Cartledge, Susie; Monash University, Department of Epidemiology and Preventive Medicine; Monash University, Saxton, Danielle ; National Heart Foundation of Australia<br>Finn, Judith; Curtin University<br>Bray, Janet; Monash University, Melbourne, Victoria, Australia, Department of Epidemiology and Preventive Medicine |
| Keywords:                     | cardiopulmonary resuscitation, resuscitation, EDUCATION & TRAINING (see Medical Education & Training), PUBLIC HEALTH                                                                                                                                                                                                           |
|                               |                                                                                                                                                                                                                                                                                                                                |

SCHOLARONE™  
Manuscripts

1  
2  
3 **Australia's awareness of cardiac arrest and rates of CPR training: results from the Heart**  
4  
5 **Foundations' Heart Watch Survey.**  
6  
7

8 Susie Cartledge<sup>1,2,3</sup>, Danielle Saxton<sup>4</sup>, Judith Finn<sup>1,5</sup>, Janet Bray<sup>1,2,5</sup>  
9

- 10  
11 1. Department of Epidemiology and Preventive Medicine, Monash University, Melbourne,  
12  
13 Victoria  
14  
15 2. Institute for Physical Activity and Nutrition, Deakin University, Melbourne, Victoria  
16  
17 3. Alfred Health, Melbourne, Victoria  
18  
19 4. National Heart Foundation, Melbourne, Victoria  
20  
21 5. Prehospital, Resuscitation and Emergency Care Research Unity (PRECRU), Curtin University,  
22  
23 Perth, Western Australia  
24  
25  
26  
27  
28  
29

30 **Corresponding Author**  
31

32  
33 Susie Cartledge  
34

35  
36 Department of Epidemiology and Preventive Medicine  
37

38  
39 553 St Kilda Road  
40

41  
42 Monash University  
43

44  
45 Melbourne, 3004  
46

47  
48 T: +61 3 9903 0320  
49

50  
51 Fax: +61 3 9903 0556  
52

53  
54 E: [susie.cartledge@monash.edu](mailto:susie.cartledge@monash.edu)  
55

56  
57  
58 **Word count: 2418**  
59  
60

1  
2  
3 **Title: Australia's awareness of cardiac arrest and rates of CPR training: results from the Heart**  
4  
5 **Foundations' Heart Watch Survey.**  
6  
7

8 **Running Title:** Australian CPR training rates  
9  
10

11  
12  
13  
14 **Abstract**  
15

16  
17 **Objective:** We aimed to provide the first national estimates of cardiopulmonary (CPR) training and  
18 awareness of cardiac arrest.  
19

20  
21 **Design:** A retrospective analysis of a national cross-sectional survey was undertaken. Data was  
22 collected online from adults in July 2017 as part of the Heart Foundation of Australia HeartWatch  
23 survey. We used logistic regression to examine demographic factors associated with CPR training.  
24  
25  
26  
27

28 **Participants:** A national cohort was invited to participate in the survey using purposive, non-  
29 probability sampling methods with quotas for age, gender and area of residence, in order to reflect  
30 the wider Australian population. The final sample consisted of 1076 respondents.  
31  
32  
33

34  
35 **Main outcome measure:** To determine an estimation of the prevalence of CPR training at a national  
36 level and if training was related to demographic factors.  
37  
38

39  
40 **Results:** The majority (76%) of respondents were born in Australia and 51% were female, 41% were  
41 aged between 35 and 64 years. Only 16% of respondents could identify the difference between a  
42 cardiac arrest and a heart attack. While 56% reported previous CPR training, only 22% were  
43 currently trained (within one year). CPR training was associated with younger age (35-54 years)  
44 (odds ratio, 1.45, 95% CI, 1.06-2.0), being born in Australia (OR, 1.59, 95% CI 1.17-2.17) and higher  
45 levels of education (university, OR, 1.86, 95% CI 1.35-2.57). CPR training increased confidence in  
46 respondents ability to perform effective CPR and use a defibrillator. Lack of CPR training was the  
47 most common reason why respondents would not provide CPR training to a stranger.  
48  
49  
50  
51  
52  
53  
54  
55  
56  
57  
58  
59  
60

1  
2  
3 **Conclusions:** There is a need to improve the community's understanding of cardiac arrest, and to  
4 increase awareness and training in CPR. CPR training rates have not changed over the past decades –  
5  
6 new initiatives are needed.  
7  
8

9  
10 **Keywords:** cardiopulmonary resuscitation, cardiac arrest, education, education surveillance,  
11  
12 resuscitation  
13  
14  
15  
16  
17

## 18 **ARTICLE SUMMARY**

### 21 **Strengths and limitations**

- 23 • This is the first time a national perspective investigating the awareness of cardiac arrest and  
24 cardiopulmonary resuscitation training has been undertaken in Australia.
- 25 • A representative group of Australians were represented in this survey using probability  
26 sampling methods that included quotas for age, gender and area of residence.
- 27 • While the limitations of cross-sectional survey methods include recall bias, our results are  
28 consistent with past surveys conducted in Australia.
- 29 • Future surveys of this nature require validation of survey questions and could employ mixed  
30 methods of using both online and phone surveys to address the challenge of participants  
31 using online searches to source survey answers.  
32  
33  
34  
35  
36  
37  
38  
39  
40  
41  
42  
43  
44  
45  
46  
47  
48  
49  
50  
51  
52  
53  
54  
55  
56  
57  
58  
59  
60

## INTRODUCTION

Bystander CPR more than doubles the chance of surviving a cardiac arrest<sup>1,2</sup>, however the provision of bystander CPR remains low.<sup>3</sup> While there has been improvement in bystander CPR rates with the introduction of dispatcher-assisted CPR instructions during the emergency call<sup>4</sup>, a significant proportion still do not feel confident to provide CPR even with instruction.<sup>5</sup>

There is growing evidence of a link between rates of bystander CPR and CPR training. Three studies have now reported communities with higher rates of bystander CPR have high rates of CPR trained residents.<sup>6-8</sup> This most likely occurs because CPR training is significantly associated with increased confidence and willingness to provide CPR.<sup>9,10</sup> Existing data also suggests specific demographics are associated with CPR training, including age, education level, country of birth and occupation.<sup>9-11</sup>

There is also a need to examine the impact of socio-economic factors on rates of bystander CPR training, as regions with lower bystander CPR also have lower CPR training rates.<sup>12,13</sup> Therefore, understanding current rates of CPR training in the community is important, and may drive local initiatives.

In Australia, CPR training is currently not mandatory, and state-based surveys<sup>9,14-16</sup> suggest that less than 60% of Australian adults have received CPR training at least once. However, these surveys were conducted in specific regions, and most more than a decade ago. This study aimed to provide the first Australian-wide estimates of CPR training and willingness to learn CPR.

## METHODS

This cross-sectional study used data from the Heart Foundations of Australia's "HeartWatch" Survey. This quarterly survey is conducted using a purposive, non-probability sampling method with quotas for age, gender and area of residence, in order to reflect the wider Australian population.

Respondents of the survey belong to an online survey panel. In July 2017, 21 questions about CPR

1  
2  
3 were added to the survey. The CPR questions (Supplementary File) were in three sections: cardiac  
4  
5 arrest knowledge; CPR knowledge and experience; and defibrillator knowledge. The Residential  
6  
7 postcodes were used to assign deciles of Socio-Economic Indexes for Areas (SEIFA)<sup>17</sup> using 2016  
8  
9 Australian Census data.  
10

11  
12 The present study was granted an ethics exemption from Monash University Human Research Ethics  
13  
14 Committee (Project Number: 12329) as data provided for the research by the Heart Foundation of  
15  
16 Australia was de-identified.  
17

### 18 19 20 *Patient and Public Involvement* 21

22  
23 The public were not invited to comment on the design of this study and were not consulted to  
24  
25 develop relevant outcomes or interpret the results. The research group (Australian and New Zealand  
26  
27 Prehospital Emergency Care [PEC-ANZ] Centre of Research Excellence) do however have  
28  
29 representatives from the public on the steering committee who will be consulted about the  
30  
31 outcomes and directions of dissemination of this research during regularly scheduled meetings.  
32  
33 Results will also be disseminated via Heart Foundation of Australia channels in addition to the  
34  
35 research group.  
36  
37

### 38 39 *Data analysis* 40

41  
42 Data were analysed using descriptive statistics with proportions expressed as percentages and tests  
43  
44 of association using chi-squared statistic between respondent characteristics and CPR training  
45  
46 status. Logistic regression was used to identify respondent characteristics independently associated  
47  
48 with CPR training. Characteristics with p-values <0.2 at the univariate level were included in the  
49  
50 model. We also conducted a sensitivity analysis in a subsample of respondents excluding those who  
51  
52 reported they had previously performed CPR. Free text responses were categorically coded by two  
53  
54 health care professionals (Registered Nurse [SC] and Paramedic [DS]), both of whom are experienced  
55  
56  
57  
58  
59  
60

community first aid trainers. Statistical significance was set at  $p < 0.05$  and analysis was conducted with Stata V15.1.

## RESULTS

The survey sample consisted of 1,076 Australian adults. Responses were received from every state and territory in Australia (Table 1). There was a similar proportion of female (n=554, 50.6%) and male (n=532, 49.4%) respondents. The majority were aged between 35 and 64 years (n = 443, 41%), had completed at least 10 years of schooling (n = 968, 90%) and were born in Australia (n= 817, 76%).

### < Table 1. Characteristics of the sample according to cardiopulmonary resuscitation training status >

#### *Cardiac arrest knowledge*

Respondents were asked if they “knew the difference between a cardiac arrest and a heart attack”. The majority of respondents stated they were “unsure” (n = 404, 37.6%), followed by “yes” (n = 356, 33.1%), with the remaining responding “no” (n=316, 29.4%). The majority of those responding “yes” had received CPR training (72%). Those who answered “yes” were then asked to describe the difference between the two conditions using free text. Less than half of the “yes” respondents identified the two conditions correctly (n = 174, 48.3%), however 22.2% (n=79) identified the conditions incorrectly or only had the definitions partially correct (n=66, 18.5%). A small proportion (n=37, 10.4%) of yes respondents declared they were unsure once asked for a definition. When coding free text descriptions of the conditions it was noted that several respondents (n=10, 2.8%) had used the exact same wording. This wording was identical to the top result from online search engine Google when pasting the question into a search.



1  
2  
3 Knowledge of signs of cardiac arrest were variable among respondents. When coding free text  
4 responses according to Australian Resuscitation Council criteria (unresponsive and not breathing  
5 normally)<sup>18</sup>, only 2.9% (n = 32) of respondents answered correctly. However, many respondents  
6 described the absence of a pulse (“no heart beat”, “heart stops”). When we added absence of a  
7 pulse as a correct descriptor of cardiac arrest 14.2% (n = 153) of respondents had the answer coded  
8 as correct. Commonly respondents described a cardiac arrest victim as either unconscious or having  
9 an absence of breathing (n = 97, 9%). Incorrect answers (n = 684, 63.6%) featured chest pain,  
10 shortness of breath, weakness and dizziness. Numerous (11.8%) respondents (n = 127) stated they  
11 were unsure of the signs and symptoms.  
12  
13

#### 14 *CPR knowledge, confidence and training preferences*

15  
16 The majority of respondents (n=969, 90.1%) had heard of CPR. Few respondents (n = 95, 8.8%) had  
17 previously performed CPR. When respondents were asked what they would do if someone was in  
18 cardiac arrest, only 9 (0.8%) respondents correctly identified the chain of survival<sup>19</sup> sequence of  
19 calling an ambulance, commencing CPR and applying a defibrillator. These respondents all had prior  
20 CPR training within five years. More respondents (n=141, 13%) were able to identify two correct  
21 actions (i.e. calling an ambulance, and CPR or defibrillation). A smaller proportion (n = 121, 11.2%)  
22 described CPR and or defibrillation but did not mention calling an ambulance. The majority of  
23 respondents (n = 536, 49.7%) responded they would call an ambulance, but did not describe any  
24 further actions.  
25  
26

27 In total 55.7% (n = 540) of respondents had undertaken CPR training previously, however a large  
28 proportion (42.5%, n = 412) had not, and a small proportion were unsure (n = 17, 1.8%), or did not  
29 answer (n = 107, 9.9%) (Figure 1A). The majority of CPR trained respondents had not been trained in  
30 CPR for over 5 years (n = 227, 42%), with only 21.7% (n = 117) classified as being currently trained  
31 (within 12 months) as per the Australian guidelines.<sup>20</sup> (Figure 1B).  
32  
33  
34  
35  
36  
37  
38  
39  
40  
41  
42  
43  
44  
45  
46  
47  
48  
49  
50  
51  
52  
53  
54  
55  
56  
57  
58  
59  
60

<Figure 1A and Figure 1B>

1  
2  
3 CPR training was not associated with any region (state or territory) of residence (Table 2) or  
4  
5 socioeconomic status (all deciles  $p > 0.05$ , data not shown). However, CPR training was associated  
6  
7 with age 35-54 years (odds ratio [OR] 1.45, 95% CI 1.06 - 2.00), Australian-born (OR 1.59, 95% CI 1.17  
8  
9 – 2.17), and university (OR 1.86, 95% CI 1.35 – 2.57) and vocational level of education (OR 2.33, 95%  
10  
11 CI 1.64 – 3.30) (Table 2). These factors remained significant when restricted to those who had not  
12  
13 previously performed CPR. The main barriers to learning CPR included lack of awareness (“never  
14  
15 thought about it”) (n = 190, 44%), not knowing where to go to learn (n = 91, 21%) and cost (12%).  
16  
17  
18 The relationship between confidence in ability to provide CPR was significantly related to CPR  
19  
20 training status, with respondents who stated they were very confident to perform CPR more likely to  
21  
22 have CPR training ( $p < 0.001$  (Figure 2).  
23  
24  
25

26  
27 Of those with no prior CPR training, the majority (n = 312, 72.7%) of respondents were willing to  
28  
29 learn CPR. The preferred format for CPR training was for group learning, led by a professional  
30  
31 provider (n = 237, 76.0%) with a smaller proportion choosing learning via self-instruction (n = 57,  
32  
33 18.3%).  
34  
35

36  
37  
38 **<Table 2. Factors associated with CPR training. >**  
39

40  
41 **<Figure 2. Self-rated confidence levels (%) about ability to perform effective CPR in an emergency**  
42  
43 **according to CPR training status.>**  
44  
45

#### 46 47 48 *Barriers to performing CPR*

49  
50  
51 Only half (n = 530, 49.3%) of respondents stated they would provide CPR to a stranger. The  
52  
53 remaining respondents were predominantly unsure (n = 307, 28.5%). In those that responded no (n  
54  
55 = 132, 12.3%) the most common response was not being trained in CPR (n = 57, 43.2%) or not feeling  
56  
57 confident (n = 26, 19.7%). Fear (n = 9, 6.8%), a physical inability (n = 5, 3.9%), or concern over  
58  
59 legalities (n = 5, 3.9%) were other factors mentioned.  
60

1  
2  
3 Of the respondents who were not CPR trained (n = 412), the majority stated they were willing to  
4 learn (n = 312, 75.7%), with only small proportion of respondents stating they were unsure (n = 74,  
5 17.9%) or unwilling (n = 26, 6.3%).  
6  
7  
8  
9

### 10 11 12 13 *Defibrillator knowledge (confidence, willingness)* 14

15  
16 The majority of respondents (n = 903, 83.9%) had heard of a defibrillator and of these respondents  
17 more than half (n = 633, 58.8%) would be willing to use it. However confidence levels to use a  
18 defibrillator were low, with a third (33.9%, n = 215) stating they were not confident. (Table 1,  
19 Supplement).  
20  
21  
22  
23  
24  
25  
26  
27  
28

## 29 **DISCUSSION**

30  
31 In this Australia-wide study, just over half (56%) of the adults reported having ever undertaken CPR  
32 training, however only 21% had current (within one year) training. CPR training was associated with  
33 younger age (35 – 54 years), being born in Australia and having a higher level of education. The  
34 association between these demographics and CPR training are similar to studies conducted in other  
35 countries.<sup>9–11</sup> Alarming however, this study found a low understanding of cardiac arrest, or being  
36 able to identify the actions involved with the chain of survival. There is a large opportunity to  
37 increase national training prevalence, as the majority of those who were untrained in CPR are willing  
38 to learn and identified that learning in a group class, led by a professional instructor was the  
39 preferred learning format.  
40  
41  
42  
43  
44  
45  
46  
47  
48  
49  
50

51  
52 The prevalence of CPR training in this Australian study are similar to other recent international  
53 surveys conducted in the United Kingdom (57%)<sup>10</sup> and the United States of America (65%)<sup>11</sup>. Unlike  
54 these countries however, Australia has no national or state-based mandatory training strategy, and  
55 there has only been limited attempts to promote awareness of cardiac arrest and CPR via mass-  
56  
57  
58  
59  
60

1  
2  
3 media (e.g. Shock Verdict <https://www.utas.edu.au/shockverdict>). These strategies are important to  
4  
5 increase cardiac arrest and CPR training knowledge and awareness and should be considered.  
6  
7

8  
9 In Australia, CPR training is only mandatory for selected professions (i.e. Health care professionals,  
10 teachers, childcare workers and fitness instructors)<sup>21</sup>. The effect of workplace training is likely  
11  
12 evidenced in our results by the fact younger working ages (35 – 54 years, OR 1.45, 95% CI 1.06 –  
13  
14 2.00) and those who attended both vocational college (OR 2.33, 95% CI 1.64-3.30) and university (OR  
15  
16 1.86, 95% Ci 1.35-2.57) were independently associated with CPR training. Recent evidence from the  
17  
18 USA<sup>22</sup> demonstrates that mandatory CPR training in schools is associated with higher levels of  
19  
20 individuals who are currently trained in CPR. Mandatory community-level training strategies require  
21  
22 cooperation from many parties including federal and state governments and Resuscitation Councils.  
23  
24 Nevertheless, these strategies have been successfully implemented elsewhere and they should not  
25  
26 be overlooked, as they could ensure a large proportion of the community receive CPR training, at  
27  
28 least once in their lifetime.  
29  
30  
31  
32

33  
34 Our results, as has been identified before<sup>10,23,24</sup>, also demonstrate that those with CPR training had  
35  
36 higher levels of self-reported confidence to perform CPR and use a defibrillator. Concurrently, the  
37  
38 most common barrier to not performing CPR in this study was not being trained. This highlights the  
39  
40 importance of CPR training especially given the positive link between levels of training and bystander  
41  
42 CPR rates.<sup>6–8</sup> CPR training is consistently related to younger age and higher levels of education both  
43  
44 in Australia<sup>9,14</sup> and internationally.<sup>11</sup> Future training initiatives need to consider targeting populations  
45  
46 less likely to receive training, particularly those that are older, who are at higher risk of future  
47  
48 cardiac events. Along with the International Liaison Committee on Resuscitation<sup>25</sup>, we also place  
49  
50 value on training high-risk populations, such as households containing a person with heart disease  
51  
52 and have success in piloting a targeted training program through cardiac rehabilitation programs.<sup>26</sup>  
53  
54  
55

56  
57 In addition to training, raising awareness of cardiac arrest and CPR training is essential. A significant  
58  
59 proportion of respondents in our study had never thought about CPR training or didn't know where  
60

1  
2  
3 to go to receive training. A national and co-ordinated campaign to increase public awareness of  
4 cardiac arrest and CPR training is warranted given the low rates of knowledge assessed in this study.  
5  
6 Highlighting the simplification of CPR through promoting hand-only CPR may encourage more  
7  
8 people to render assistance in an emergency and to undertake training. As traditional television,  
9  
10 radio and print mass media campaigns are very costly, dissemination of these messages via social  
11  
12 media should be investigated.<sup>27</sup> These approaches could be successful now that smartphones and  
13  
14 other digital mobile devices are almost ubiquitous in Australia, including among older Australians.<sup>28</sup>  
15  
16  
17 In the modern era, CPR training can be provided in many formats (e.g. with an instructor, via self-  
18  
19 instruction, online). The majority of respondents in our study stated they would prefer to learn from  
20  
21 an instructor in a class, with a smaller proportion preferring self-instruction. Now that “hands-only”  
22  
23 CPR is the preferred teaching method for lay people<sup>18</sup>, the simplified algorithm has the benefits of  
24  
25 being appropriate for all levels of literacy and education, in addition to decreasing barriers to  
26  
27 performing CPR (such as mouth-to-mouth ventilations).  
28  
29  
30  
31  
32

33  
34 Our study is subject to a number of potential limitations. Firstly, the online survey may be subject to  
35  
36 selection bias. Secondly, the survey questions were not formally validated. It is therefore possible  
37  
38 that some respondents may not have understood some of the questions or terms such as cardiac  
39  
40 arrest. We also acknowledge that survey methodology is subject to recall bias. However, our results  
41  
42 are consistent with previous Australian<sup>14,15</sup> and international research.<sup>10,11</sup> Thirdly, the survey was  
43  
44 restricted to those who could read and respond in English. Additionally, future online survey's need  
45  
46 to be aware that some participants will undertake an online search to answer questions. In our case,  
47  
48 we saw ten identical answers to one question and upon further examination determined these had  
49  
50 been copied and pasted from the top search result of Google. Future online surveys could  
51  
52 supplement responses using other methods such as a phone survey to address this issue.  
53  
54  
55

56  
57 In conclusion, our data suggest CPR training rates in Australia are unchanged over the past decades,  
58  
59 however the majority of untrained respondents were willing to learn. This willingness should be  
60

1  
2  
3 leveraged through national training and awareness strategies to increase knowledge of cardiac  
4  
5 arrest and CPR. Such strategies need to consider targeting training to men, those with lower levels of  
6  
7 education and those born overseas.  
8  
9

### 10 11 12 13 **Funding statement**

14  
15  
16 Associate Professor Bray was funded by a Heart Foundation Fellowship (No. 101171). The study was  
17  
18 also supported by the National Health and Medical Research Council (NHMRC) funded Australian  
19  
20 and New Zealand Prehospital Emergency Care (PEC-ANZ) Centre of Research Excellence (No.  
21  
22 1116453).  
23  
24  
25  
26  
27  
28

### 29 **Competing interests**

30  
31 All authors have completed the ICMJE uniform disclosure form. No competing interests to declare.  
32  
33  
34  
35  
36  
37

### 38 **Authors contributions**

39  
40 SC and JB led the data analysis and drafted the paper. DS contributed to data analysis. All authors  
41  
42 contributed to critical revisions of the paper.  
43  
44  
45  
46  
47

### 48 **Data sharing statement**

49  
50  
51 No additional data are available as data are owned by the National Heart Foundation of Australia.  
52  
53  
54  
55  
56  
57  
58  
59  
60

## References

1. Sasson C, Rogers MAM, Dahl J, Kellermann AL. Predictors of survival from out-of-hospital cardiac arrest: a systematic review and meta-analysis. *Circulation Cardiovascular quality and outcomes*. 2010;3(1):63–81.
2. Hasselqvist-Ax I, Riva G, Herlitz J, Rosenqvist M, Hollenberg J, Nordberg P, et al. Early Cardiopulmonary Resuscitation in Out-of-Hospital Cardiac Arrest. *New England Journal of Medicine*. 2015 Jun 11;372(24):2307–15.
3. Beck B, Bray J, Cameron P, Smith K, Walker T, Grantham H, et al. Regional variation in the characteristics, incidence and outcomes of out-of-hospital cardiac arrest in Australia and New Zealand: results from the Aus-ROC Epistry. *Resuscitation*. 2018;126:49–57.
4. Bray JE, Deasy C, Walsh J, Bacon A, Currell A, Smith K. Changing EMS dispatcher CPR instructions to 400 compressions before mouth-to-mouth improved bystander CPR rates. *Resuscitation*. 2011 Nov;82(11):1393–8.
5. Case R, Cartledge S, Siedenburg J, Smith K, Straney L, Barger B, et al. Identifying barriers to the provision of bystander cardiopulmonary resuscitation (CPR) in high-risk regions: A qualitative review of emergency calls. *Resuscitation*. 2018;129:43–47.
6. Bray JE, Straney L, Smith K, Cartledge S, Case R, Bernard S, et al. Regions with low rates of bystander CPR have lower rates of CPR training in Victoria, Australia. *Journal of American Heart Association*. 2017;6:e005972.
7. Ro YS, Do Shin S, Song KJ, Hong SO, Kim YT, Lee D-W, et al. Public awareness and self-efficacy of cardiopulmonary resuscitation in communities and outcomes of out-of-hospital cardiac arrest: A multi-level analysis. *Resuscitation*. 2016;102:17–24.

- 1  
2  
3 8. Anderson ML, Cox M, Al - Khatib SM, Nichol G, Thomas KL, Chan PS, et al. Rates of  
4  
5 cardiopulmonary resuscitation training in the United States.(Report). JAMA Internal Medicine.  
6  
7 2014;174(2):194.  
8  
9
- 10  
11 9. Bray JE, Smith K, Case R, Cartledge S, Straney L, Finn J. Public cardiopulmonary resuscitation  
12  
13 training rates and awareness of hands-only cardiopulmonary resuscitation: a cross-sectional  
14  
15 survey of Victorians. Emergency Medicine Australasia. 2017;29(2):158–164.  
16  
17
- 18  
19 10. Hawkes CA, Brown TP, Booth S, Fothergill RT, Siriwardena N, Zakaria S, et al. Attitudes to  
20  
21 cardiopulmonary resuscitation and defibrillator use: a survey of UK adults in 2017. Journal of the  
22  
23 American Heart Association. 2019;8(7):e008267.  
24  
25
- 26  
27 11. Blewer AL, Ibrahim SA, Leary M, Dutwin D, McNally B, Anderson ML, et al. Cardiopulmonary  
28  
29 Resuscitation Training Disparities in the United States. Journal of the American Heart  
30  
31 Association. 2017 May 1;6(5):e006124.  
32  
33
- 34  
35 12. Sasson C, Magid DJ, Chan P, Root ED, Mcnally BF, Kellermann AL, et al. Association of  
36  
37 neighborhood characteristics with bystander-initiated CPR. The New England journal of  
38  
39 medicine. 2012;367(17):1607–15.  
40  
41
- 42  
43 13. Vaillancourt C, Lui A, De Maio VJ, Wells GA, Stiell IG. Socioeconomic status influences bystander  
44  
45 CPR and survival rates for out-of-hospital cardiac arrest victims. RESUSCITATION. 2008;79(3).  
46  
47
- 48  
49 14. Smith KL, Cameron PA, Meyer ADM, McNeil JJ. Is the public equipped to act in out of hospital  
50  
51 cardiac emergencies? Emergency Medicine Journal. 2003 Jan 1;20(1):85–7.  
52  
53
- 54  
55 15. Jelinek GA, Gennat H, Celenza T, O'Brien D, Jacobs I, Lynch D. Community attitudes towards  
56  
57 performing cardiopulmonary resuscitation in Western Australia. Resuscitation. 2001  
58  
59 Dec;51(3):239–46.  
60



- 1  
2  
3 16. Johnston TC, Clark MJ, Dingle GA, FitzGerald G. Factors influencing Queenslanders' willingness to  
4 perform bystander cardiopulmonary resuscitation. *Resuscitation*. 2003 Jan;56(1):67–75.  
5  
6  
7
- 8  
9 17. Australian Bureau of Statistics. Socio-Economic Indexes for Areas [Internet]. Socio-Economic  
10 Indexes for Areas. 2018 [cited 2019 Jun 27]. Available from:  
11 <https://www.abs.gov.au/websitedbs/censushome.nsf/home/seifa>  
12  
13  
14
- 15  
16 18. Australian and New Zealand Committee on Resuscitation. ANZCOR Guideline 8,  
17 cardiopulmonary resuscitation [Internet]. 2016 [cited 2016 Nov 14] p. 1–5. Report No.: Section  
18 8, Cardiopulmonary resuscitation. Available from: <https://resus.org.au/guidelines/>  
19  
20  
21  
22
- 23  
24 19. Cummins R, Ornato J, Thies W, Pepe P, Billi J, Seidel J, et al. Improving survival from sudden  
25 cardiac-arrest - the chain of survival concept - a statement for health-professionals from the  
26 advanced cardiac life-support subcommittee and the emergency cardiac care committee,  
27 American-Heart-Association. *Circulation*. 1991;83:1832–47.  
28  
29  
30  
31  
32
- 33  
34 20. Australian and New Zealand Committee on Resuscitation. ANZCOR Guideline 10.1, basic life  
35 support training [Internet]. 2016 [cited 2016 Nov 14] p. 1–5. Report No.: Section 8,  
36 Cardiopulmonary resuscitation. Available from: <https://resus.org.au/guidelines/>  
37  
38  
39  
40
- 41  
42 21. Safe Work Australia. Safe Work Australia First Aid [Internet]. Canberra, Australia; 2018 Sep [cited  
43 2019 Jun 29] p. 1–28. Available from: <https://www.safeworkaustralia.gov.au/first-aid>  
44  
45  
46
- 47  
48 22. Alexander TD, McGovern SK, Leary M, Abella BS, Blewer AL. Association of state-level CPR  
49 training initiatives with layperson CPR knowledge in the United States. *Resuscitation*. 2019 Jul  
50 1;140:9–15.  
51  
52  
53
- 54  
55 23. Gräsner J-T, Lefering R, Koster RW, Masterson S, Böttiger BW, Herlitz J, et al. EuReCa ONE 27  
56 Nations, ONE Europe, ONE Registry: A prospective one month analysis of out-of-hospital cardiac  
57 arrest outcomes in 27 countries in Europe. *Resuscitation*. 2016 Aug;105:188–95.  
58  
59  
60

- 1  
2  
3 24. Perkins GD, Travers AH, Berg RA, Castren M, Considine J, Escalante R, et al. Part 3: Adult basic  
4 life support and automated external defibrillation: 2015 International Consensus on  
5  
6 Cardiopulmonary Resuscitation and Emergency Cardiovascular Care Science with Treatment  
7  
8 Recommendations. *Resuscitation*. 2015 Oct;95:e43–69.  
9  
10  
11  
12  
13 25. Finn JC, Bhanji F, Lockey A, Monsieurs K, Frengley R, Iwami T, et al. Part 8: Education,  
14 implementation, and teams: 2015 International Consensus on Cardiopulmonary Resuscitation  
15  
16 and Emergency Cardiovascular Care Science with Treatment Recommendations. *Resuscitation*.  
17  
18 2015 Oct;95:e203–24.  
19  
20  
21  
22  
23 26. Cartledge S, Finn J, Bray JE, Case R, Barker L, Missen D, et al. Incorporating cardiopulmonary  
24 resuscitation training into a cardiac rehabilitation programme: A feasibility study. *European*  
25  
26 *Journal of Cardiovascular Nursing*. 2017;17(2):148–58.  
27  
28  
29  
30 27. Greif R, Lockey AS, Conaghan P, Lippert A, De Vries W, Monsieurs KG, et al. European  
31 resuscitation council guidelines for resuscitation 2015: section 10. Education and  
32  
33 implementation of resuscitation. *Resuscitation*. 2015;95:288–301.  
34  
35  
36  
37  
38 28. Deloitte. Mobile phone consumer survey 2015 - The Australian Cut [Internet]. Sydney; 2017  
39 [cited 2019 Apr 30] p. 1–51. Available from: [http://landing.deloitte.com.au/rs/761-IBL-  
40  
41  
42  
43  
44  
45  
46  
47  
48  
49  
50  
51  
52  
53  
54  
55  
56  
57  
58  
59  
60](http://landing.deloitte.com.au/rs/761-IBL-328/images/tmt-mobile-consumer-survey-2017_pdf.pdf)

**Table 1. Characteristics of the sample according to cardiopulmonary resuscitation training status**

|                         | Overall n = 1076 | CPR training status            |                                    |         |
|-------------------------|------------------|--------------------------------|------------------------------------|---------|
|                         |                  | CPR trained<br>n = 540 (55.7%) | Not CPR trained<br>n = 429 (44.3%) | p value |
| <b>Gender</b>           |                  |                                |                                    |         |
| Female                  | 544 (50.6%)      | 292 (54.1%)                    | 210 (48.9%)                        | 0.11    |
| Male                    | 532 (49.4%)      | 248 (45.9%)                    | 219 (51.1%)                        |         |
| <b>Age</b>              |                  |                                |                                    |         |
| 18 – 34                 | 114 (10.6%)      | 154 (28.5%)                    | 135 (31.4%)                        | 0.07    |
| 35-44                   | 220 (20.5%)      | 231 (42.8%)                    | 149 (34.7%)                        |         |
| 45-64                   | 223 (20.7%)      | 142 (26.3%)                    | 130 (30.3%)                        |         |
| 75+                     | 207 (19.2%)      | 13 (2.4%)                      | 15 (3.5%)                          |         |
| <b>Country of birth</b> |                  |                                |                                    |         |
| Australia               | 817 (75.9%)      | 431 (79.8%)                    | 311 (72.5%)                        | 0.03    |
| Overseas                | 253 (23.5%)      | 108 (20.0%)                    | 116 (27.0%)                        |         |
| Prefer not to answer    | 6 (0.6%)         | 1 (0.2%)                       | 2 (0.5%)                           |         |

1  
2  
3  
4  
5  
6  
7  
8  
9  
10  
11  
12  
13  
14  
15  
16  
17  
18  
19  
20  
21  
22  
23  
24  
25  
26  
27  
28  
29  
30  
31  
32  
33  
34  
35  
36  
37  
38  
39  
40  
41  
42  
43  
44  
45  
46

**State**

|                              |             |             |             |      |
|------------------------------|-------------|-------------|-------------|------|
| Australian Capital Territory | 8 (0.7%)    | 4 (0.7%)    | 4 (0.9%)    | 0.83 |
| New South Wales and          | 339 (31.5%) | 174 (32.2%) | 127 (29.6%) |      |
| Northern Territory           | 4 (0.4%)    | 2 (0.4%)    | 2 (0.5%)    |      |
| Queensland                   | 218 (20.3%) | 111 (20.6%) | 92 (21.4%)  |      |
| South Australia              | 85 (7.9%)   | 43 (8.0%)   | 33 (7.7%)   |      |
| Tasmania                     | 24 (2.2%)   | 16 (3.0%)   | 6 (1.4%)    |      |
| Victoria                     | 284 (26.4%) | 132 (24.4%) | 115 (26.8%) |      |
| Western Australia            | 114 (10.6%) | 58 (10.7%)  | 44 (10.3%)  |      |

**Education**

|                         |             |             |             |        |
|-------------------------|-------------|-------------|-------------|--------|
| Primary or grade school | 3 (0.3%)    | 1 (0.2%)    | 2 (0.5%)    | <0.001 |
| Some high school        | 97 (9%)     | 41 (7.8%)   | 44 (10.3%)  |        |
| High school graduate    | 193 (17.9%) | 75 (13.9%)  | 104 (24.2%) |        |
| Technical college       | 302 (28.1%) | 179 (33.2%) | 102 (23.8%) |        |
| University diploma      | 332 (30.9%) | 161 (29.8%) | 133 (31.0%) |        |
| Postgraduate            | 141 (13.1%) | 78 (14.4%)  | 43 (10.0%)  |        |

1  
2  
3  
4  
5  
6  
7  
8  
9  
10  
11  
12  
13  
14  
15  
16  
17  
18  
19  
20  
21  
22  
23  
24  
25  
26  
27  
28  
29  
30  
31  
32  
33  
34  
35  
36  
37  
38  
39  
40  
41  
42  
43  
44  
45  
46

|                                           |                  |                   |                  |                   |
|-------------------------------------------|------------------|-------------------|------------------|-------------------|
| Prefer not to answer                      | 8 (0.8%)         | 5 (0.9%)          | 2 (0.5%)         |                   |
| <b>Previously performed emergency CPR</b> | <b>95 (8.8%)</b> | <b>84 (15.5%)</b> | <b>11 (2.6%)</b> | <b>&lt;0.0001</b> |

---

For peer review only

**Table 2.** Factors associated with CPR training.

|                     | OR (95% CI)      | p-value |
|---------------------|------------------|---------|
| Females             | 1.30 (0.99-1.70) | 0.05    |
| Age                 |                  |         |
| 18-34               | Ref              |         |
| 35-54               | 1.45 (1.06-2.00) | 0.02    |
| 55-74               | 1.11 (0.78-1.58) | 0.55    |
| >75                 | 0.92 (0.42-2.06) | 0.85    |
| Australian born     | 1.59 (1.17-2.17) | 0.003   |
| Education           |                  |         |
| High school or less | Ref              |         |
| Vocational college  | 2.33 (1.64-3.30) | <0.001  |
| University          | 1.86 (1.35-2.57) | <0.001  |

1  
2  
3  
4  
5  
6  
7  
8  
9  
10  
11  
12  
13  
14  
15  
16  
17  
18  
19  
20  
21  
22  
23  
24  
25  
26  
27  
28  
29  
30  
31  
32  
33  
34  
35  
36  
37  
38  
39  
40  
41  
42  
43  
44  
45  
46  
47  
48  
49  
50  
51  
52  
53  
54  
55  
56  
57  
58  
59  
60

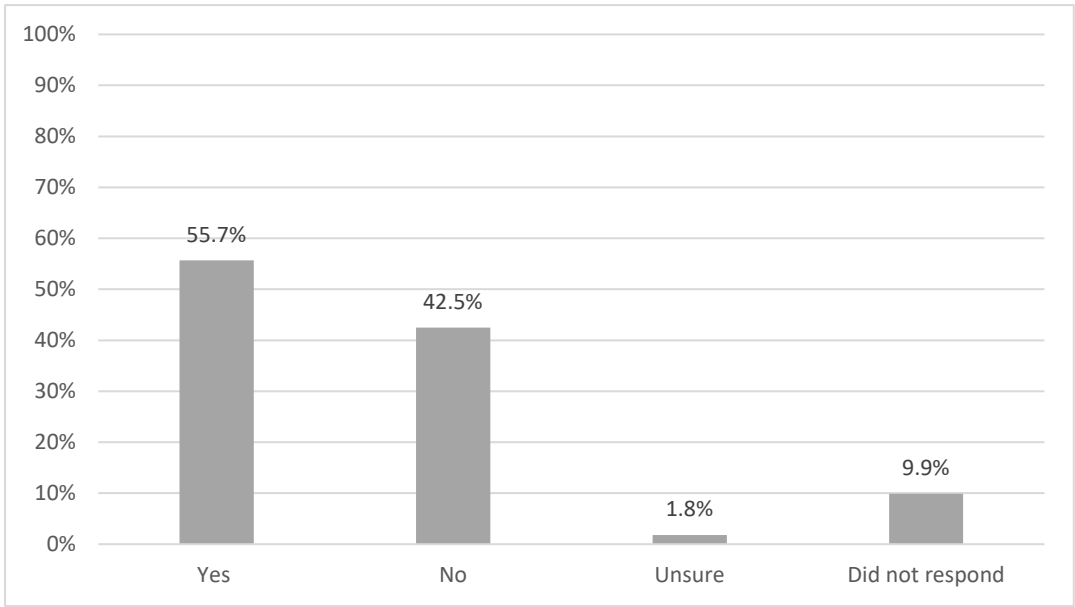

**Figure 1A:** Proportion of sample who have “ever had” CPR training

Peer review only

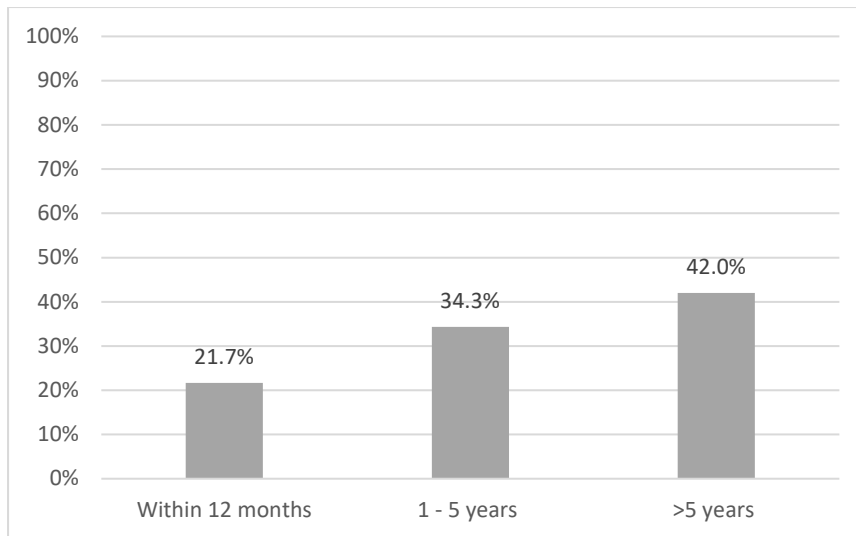

**Figure 1B:** Of those with CPR training, years since last training completed.



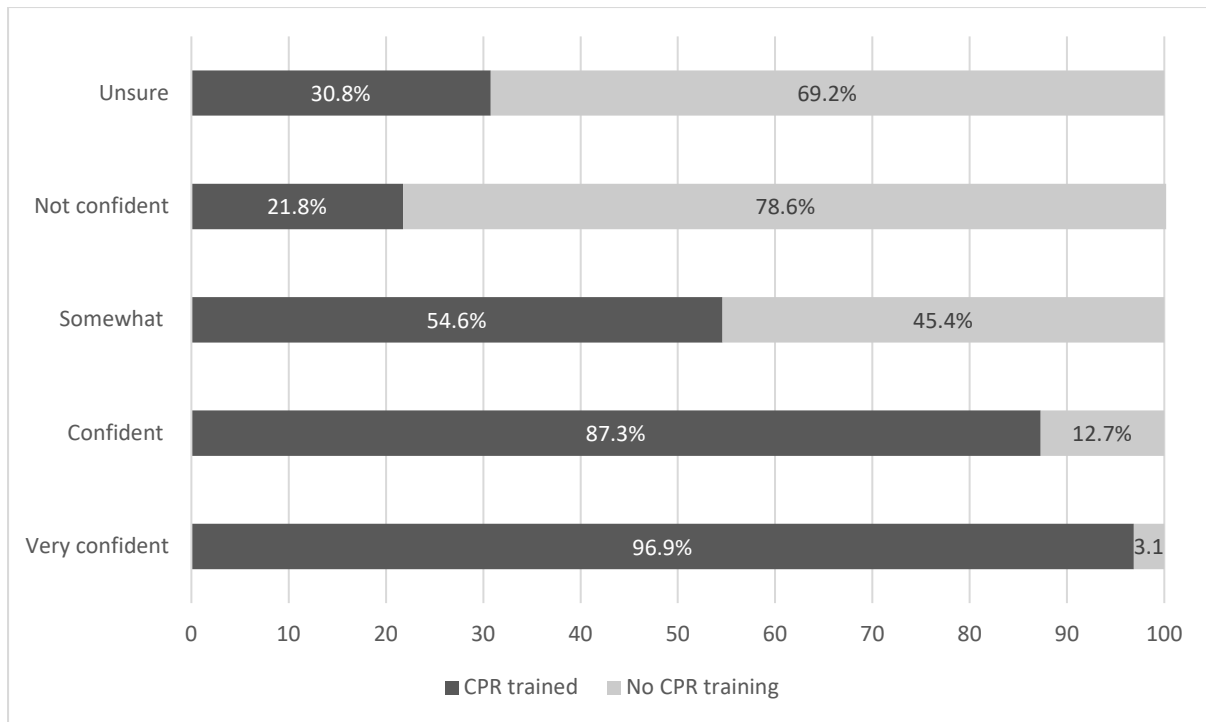

**Figure 2.** Self-rated confidence levels (%) about ability to perform effective CPR in an emergency

**Supplementary 1: CPR specific questions of HeartWatch Survey 2017**

1. To begin with could you please confirm your age?
2. What gender are you?
3. Where do you live?
4. What is your postcode?
5. Where you born in Australia or overseas?
6. What is the highest level of schooling you have received?
7. Do you know the difference between a cardiac arrest and a heart attack?
8. How would you describe the difference between a cardiac arrest and a heart attack?
9. What symptoms or signs would you associate with having a cardiac arrest?
10. What do you think you would do if you saw someone in cardiac arrest?
11. Have you ever heard of cardiopulmonary resuscitation, also known as CPR or mouth-to-mouth?
12. What is your understanding of when a person requires CPR?
13. Which of the following reflects how confident you currently feel about your ability to perform effective CPR in an emergency?
14. Have you ever performed CPR in a real-life emergency?
15. Would you intervene and provide CPR to a stranger?
16. Why would you not provide CPR?
17. Would you provide CPR to a family member or someone you know?
18. When a person has a cardiac arrest, CPR can more than double a person's chance of survival. Now knowing this, would you be more likely to provide CPR to a stranger?
19. Have you been trained in CPR?
20. How long ago did you receive the CPR training?

- 1  
2  
3 21. Which of these statements best describes your reasons for not receiving CPR  
4 training?  
5  
6  
7 22. Would you be willing to learn CPR?  
8  
9 23. Which format of learning CPR would you prefer?  
10  
11 24. Have you ever heard of a defibrillator?  
12  
13 25. Would you be willing to use a defibrillator to help someone in difficulty/in an  
14 emergency?  
15  
16 26. Which of the following reflects how confident you currently feel about using a  
17 defibrillator in an emergency?  
18  
19 27. Why would you not use a defibrillator to help someone in difficulty/in an  
20 emergency?  
21  
22 28. How long do you think someone will survive after a cardiac arrest without CPR or  
23 defibrillation?  
24  
25  
26  
27  
28  
29  
30  
31  
32  
33  
34  
35  
36  
37  
38  
39  
40  
41  
42  
43  
44  
45  
46  
47  
48  
49  
50  
51  
52  
53  
54  
55  
56  
57  
58  
59  
60

## Supplementary 2: Defibrillator knowledge

|                                                     | Overall n = 1076 | CPR training status            |                                    |
|-----------------------------------------------------|------------------|--------------------------------|------------------------------------|
|                                                     |                  | CPR trained<br>n = 540 (55.7%) | Not CPR trained<br>n = 429 (44.3%) |
| <b>Have you ever heard of a defibrillator?</b>      |                  |                                |                                    |
| Yes                                                 | 903 (83.9%)      | 511 (94.6%)                    | 392 (91.4%)                        |
| No                                                  | 127 (11.8%)      | 20 (3.7%)                      | 107 (24.9%)                        |
| Unsure                                              | 46 (4.3%)        | 9 (1.7%)                       | 37 (8.6%)                          |
| <b>Willingness to use a defibrillator</b>           |                  |                                |                                    |
| Yes                                                 | 633 (58.8%)      | 390 (72.2%)                    | 243 (56.6%)                        |
| No                                                  | 73 (6.8%)        | 27 (5.0%)                      | 46 (10.7%)                         |
| Unsure                                              | 197 (18.3%)      | 94 (17.4%)                     | 103 (24.0%)                        |
| <b>Self-rated confidence to use a defibrillator</b> |                  |                                |                                    |
| Very confident                                      | 85 (7.9%)        | 77 (14.3%)                     | 8 (1.9%)                           |
| Confident                                           | 137 (12.7%)      | 119 (22.0%)                    | 18 (4.2%)                          |
| Somewhat confident                                  | 187 (17.4%)      | 118 (21.9%)                    | 69 (16.1%)                         |
| Not confident                                       | 215 (20.0%)      | 73 (13.5%)                     | 142 (33.1%)                        |
| Unsure                                              | 9 (0.8%)         | 3 (0.6%)                       | 6 (1.4%)                           |

**STROBE 2007 (v4) Statement—Checklist of items that should be included in reports of *cross-sectional studies***

| Section/Topic                | Item # | Recommendation                                                                                                                                                                       | Reported on page #      |
|------------------------------|--------|--------------------------------------------------------------------------------------------------------------------------------------------------------------------------------------|-------------------------|
| Title and abstract           | 1      | (a) Indicate the study's design with a commonly used term in the title or the abstract                                                                                               | 2                       |
|                              |        | (b) Provide in the abstract an informative and balanced summary of what was done and what was found                                                                                  | 2                       |
| <b>Introduction</b>          |        |                                                                                                                                                                                      |                         |
| Background/rationale         | 2      | Explain the scientific background and rationale for the investigation being reported                                                                                                 | 4                       |
| Objectives                   | 3      | State specific objectives, including any prespecified hypotheses                                                                                                                     | 4                       |
| <b>Methods</b>               |        |                                                                                                                                                                                      |                         |
| Study design                 | 4      | Present key elements of study design early in the paper                                                                                                                              | 4 - 5                   |
| Setting                      | 5      | Describe the setting, locations, and relevant dates, including periods of recruitment, exposure, follow-up, and data collection                                                      | 4 - 5                   |
| Participants                 | 6      | (a) Give the eligibility criteria, and the sources and methods of selection of participants                                                                                          | 4 - 5                   |
| Variables                    | 7      | Clearly define all outcomes, exposures, predictors, potential confounders, and effect modifiers. Give diagnostic criteria, if applicable                                             | 5                       |
| Data sources/<br>measurement | 8*     | For each variable of interest, give sources of data and details of methods of assessment (measurement). Describe comparability of assessment methods if there is more than one group | NA                      |
| Bias                         | 9      | Describe any efforts to address potential sources of bias                                                                                                                            | NA                      |
| Study size                   | 10     | Explain how the study size was arrived at                                                                                                                                            | NA – secondary analysis |
| Quantitative variables       | 11     | Explain how quantitative variables were handled in the analyses. If applicable, describe which groupings were chosen and why                                                         |                         |
| Statistical methods          | 12     | (a) Describe all statistical methods, including those used to control for confounding                                                                                                | 5                       |
|                              |        | (b) Describe any methods used to examine subgroups and interactions                                                                                                                  | NA                      |
|                              |        | (c) Explain how missing data were addressed                                                                                                                                          | NA                      |
|                              |        | (d) If applicable, describe analytical methods taking account of sampling strategy                                                                                                   | NA                      |
|                              |        | (e) Describe any sensitivity analyses                                                                                                                                                | NA                      |

|                          |     |                                                                                                                                                                                                              |        |
|--------------------------|-----|--------------------------------------------------------------------------------------------------------------------------------------------------------------------------------------------------------------|--------|
| <b>Results</b>           |     |                                                                                                                                                                                                              |        |
| Participants             | 13* | (a) Report numbers of individuals at each stage of study—eg numbers potentially eligible, examined for eligibility, confirmed eligible, included in the study, completing follow-up, and analysed            | 5 - 6  |
|                          |     | (b) Give reasons for non-participation at each stage                                                                                                                                                         | NA     |
|                          |     | (c) Consider use of a flow diagram                                                                                                                                                                           | NA     |
| Descriptive data         | 14* | (a) Give characteristics of study participants (eg demographic, clinical, social) and information on exposures and potential confounders                                                                     | 5 - 6  |
|                          |     | (b) Indicate number of participants with missing data for each variable of interest                                                                                                                          | 5 - 8  |
| Outcome data             | 15* | Report numbers of outcome events or summary measures                                                                                                                                                         | 5 - 8  |
| Main results             | 16  | (a) Give unadjusted estimates and, if applicable, confounder-adjusted estimates and their precision (eg, 95% confidence interval). Make clear which confounders were adjusted for and why they were included | NA     |
|                          |     | (b) Report category boundaries when continuous variables were categorized                                                                                                                                    | NA     |
|                          |     | (c) If relevant, consider translating estimates of relative risk into absolute risk for a meaningful time period                                                                                             | NA     |
| Other analyses           | 17  | Report other analyses done—eg analyses of subgroups and interactions, and sensitivity analyses                                                                                                               | NA     |
| <b>Discussion</b>        |     |                                                                                                                                                                                                              |        |
| Key results              | 18  | Summarise key results with reference to study objectives                                                                                                                                                     | 9 – 11 |
| Limitations              | 19  | Discuss limitations of the study, taking into account sources of potential bias or imprecision. Discuss both direction and magnitude of any potential bias                                                   | 11     |
| Interpretation           | 20  | Give a cautious overall interpretation of results considering objectives, limitations, multiplicity of analyses, results from similar studies, and other relevant evidence                                   | 11     |
| Generalisability         | 21  | Discuss the generalisability (external validity) of the study results                                                                                                                                        | 11     |
| <b>Other information</b> |     |                                                                                                                                                                                                              |        |
| Funding                  | 22  | Give the source of funding and the role of the funders for the present study and, if applicable, for the original study on which the present article is based                                                | 11     |

\*Give information separately for cases and controls in case-control studies and, if applicable, for exposed and unexposed groups in cohort and cross-sectional studies.

**Note:** An Explanation and Elaboration article discusses each checklist item and gives methodological background and published examples of transparent reporting. The STROBE checklist is best used in conjunction with this article (freely available on the Web sites of PLoS Medicine at <http://www.plosmedicine.org/>, Annals of Internal Medicine at <http://www.annals.org/>, and Epidemiology at <http://www.epidem.com/>). Information on the STROBE Initiative is available at [www.strobe-statement.org](http://www.strobe-statement.org).

# BMJ Open

## Australia's awareness of cardiac arrest and rates of CPR training: results from the Heart Foundations' Heart Watch Survey.

|                                 |                                                                                                                                                                                                                                                                                                                                |
|---------------------------------|--------------------------------------------------------------------------------------------------------------------------------------------------------------------------------------------------------------------------------------------------------------------------------------------------------------------------------|
| Journal:                        | <i>BMJ Open</i>                                                                                                                                                                                                                                                                                                                |
| Manuscript ID                   | bmjopen-2019-033722.R1                                                                                                                                                                                                                                                                                                         |
| Article Type:                   | Original research                                                                                                                                                                                                                                                                                                              |
| Date Submitted by the Author:   | 13-Nov-2019                                                                                                                                                                                                                                                                                                                    |
| Complete List of Authors:       | Cartledge, Susie; Monash University, Department of Epidemiology and Preventive Medicine; Monash University, Saxton, Danielle ; National Heart Foundation of Australia<br>Finn, Judith; Curtin University<br>Bray, Janet; Monash University, Melbourne, Victoria, Australia, Department of Epidemiology and Preventive Medicine |
| <b>Primary Subject Heading</b>: | Public health                                                                                                                                                                                                                                                                                                                  |
| Secondary Subject Heading:      | Emergency medicine, Epidemiology                                                                                                                                                                                                                                                                                               |
| Keywords:                       | cardiopulmonary resuscitation, resuscitation, EDUCATION & TRAINING (see Medical Education & Training), PUBLIC HEALTH                                                                                                                                                                                                           |
|                                 |                                                                                                                                                                                                                                                                                                                                |

SCHOLARONE™  
Manuscripts

1  
2  
3 **Australia's awareness of cardiac arrest and rates of CPR training: results from the Heart**  
4  
5 **Foundations' Heart Watch Survey.**  
6  
7

8 Susie Cartledge<sup>1,2,3</sup>, Danielle Saxton<sup>4</sup>, Judith Finn<sup>1,5</sup>, Janet Bray<sup>1,2,5</sup>  
9

- 10  
11 1. Department of Epidemiology and Preventive Medicine, Monash University, Melbourne,  
12  
13 Victoria  
14  
15 2. Institute for Physical Activity and Nutrition, Deakin University, Melbourne, Victoria  
16  
17 3. Alfred Health, Melbourne, Victoria  
18  
19 4. National Heart Foundation, Melbourne, Victoria  
20  
21 5. Prehospital, Resuscitation and Emergency Care Research Unity (PRECRU), Curtin University,  
22  
23 Perth, Western Australia  
24  
25  
26  
27  
28  
29

30 **Corresponding Author**  
31

32  
33 Susie Cartledge  
34

35  
36 Department of Epidemiology and Preventive Medicine  
37

38  
39 553 St Kilda Road  
40

41  
42 Monash University  
43

44  
45 Melbourne, 3004  
46

47  
48 T: +61 3 9903 0320  
49

50  
51 Fax: +61 3 9903 0556  
52

53  
54 E: [susie.cartledge@monash.edu](mailto:susie.cartledge@monash.edu)  
55

56  
57 E: [susie.cartledge@deakin.edu.au](mailto:susie.cartledge@deakin.edu.au)  
58  
59  
60



1  
2  
3 **Word count: 2510**  
4  
5  
6  
7  
8  
9  
10  
11  
12  
13  
14  
15  
16  
17  
18  
19  
20  
21  
22  
23  
24  
25  
26  
27  
28  
29  
30  
31  
32  
33  
34  
35  
36  
37  
38  
39  
40  
41  
42  
43  
44  
45  
46  
47  
48  
49  
50  
51  
52  
53  
54  
55  
56  
57  
58  
59  
60

For peer review only

1  
2  
3 **Title: Australia's awareness of cardiac arrest and rates of CPR training: results from the Heart**  
4  
5 **Foundations' Heart Watch Survey.**  
6  
7

8 **Running Title:** Australian CPR training rates  
9  
10

11  
12  
13  
14 **Abstract**  
15

16  
17 **Objective:** We aimed to provide the first national estimates of cardiopulmonary (CPR) training and  
18 awareness of cardiac arrest.  
19

20  
21 **Design:** A retrospective analysis of a national cross-sectional survey was undertaken. Data was  
22 collected online from adults in July 2017 as part of the Heart Foundation of Australia HeartWatch  
23 survey. We used logistic regression to examine demographic factors associated with CPR training.  
24  
25  
26  
27

28 **Participants:** A national cohort was invited to participate in the survey using purposive, non-  
29 probability sampling methods with quotas for age, gender and area of residence, in order to reflect  
30 the wider Australian population. The final sample consisted of 1076 respondents.  
31  
32  
33

34  
35 **Main outcome measure:** To determine an estimation of the prevalence of CPR training at a national  
36 level and if training was related to demographic factors.  
37  
38

39  
40 **Results:** The majority (76%) of respondents were born in Australia and 51% were female, 41% were  
41 aged between 35 and 64 years. Only 16% of respondents could identify the difference between a  
42 cardiac arrest and a heart attack. While 56% reported previous CPR training, only 22% were  
43 currently trained (within one year). CPR training was associated with younger age (35-54 years)  
44 (odds ratio (OR), 1.45, 95% confidence interval (CI), 1.06-2.0), being born in Australia (OR, 1.59, 95%  
45 CI 1.17-2.17) and higher levels of education (university, OR, 1.86, 95% CI 1.35-2.57). CPR training  
46 increased confidence in respondents ability to perform effective CPR and use a defibrillator. Lack of  
47 CPR training was the most common reason why respondents would not provide CPR training to a  
48 stranger.  
49  
50  
51  
52  
53  
54  
55  
56  
57  
58  
59  
60

1  
2  
3 **Conclusions:** There is a need to improve the community's understanding of cardiac arrest, and to  
4  
5 increase awareness and training in CPR. CPR training rates have not changed over the past decades –  
6  
7 new initiatives are needed.  
8

9  
10 **Keywords:** cardiopulmonary resuscitation, cardiac arrest, education, education surveillance,  
11  
12 resuscitation  
13

## 14 15 16 17 18 **ARTICLE SUMMARY**

### 19 20 21 **Strengths and limitations**

- 22  
23 • This is the first time a national perspective investigating the awareness of cardiac arrest and  
24  
25 cardiopulmonary resuscitation training has been undertaken in Australia.
- 26  
27 • A representative group of Australians were represented in this survey using probability  
28  
29 sampling methods that included quotas for age, gender and area of residence.
- 30  
31 • While the limitations of cross-sectional survey methods include recall bias, our results are  
32  
33 consistent with past surveys conducted in Australia.
- 34  
35 • Future surveys of this nature require validation of survey questions and could employ mixed  
36  
37 methods of using both online and phone surveys to address the challenge of participants  
38  
39 using online searches to source survey answers.  
40  
41  
42  
43  
44  
45  
46  
47  
48  
49  
50  
51  
52  
53  
54  
55  
56  
57  
58  
59  
60

## INTRODUCTION

Bystander CPR more than doubles the chance of surviving a cardiac arrest,<sup>1,2</sup> however the provision of bystander CPR remains low.<sup>3</sup> While there has been improvement in bystander CPR rates with the introduction of dispatcher-assisted CPR instructions during the emergency call,<sup>4</sup> a significant proportion still do not feel confident to provide CPR even with instruction.<sup>5</sup>

There is growing evidence of a link between rates of bystander CPR and CPR training. Three studies have now reported communities with higher rates of bystander CPR have high rates of CPR trained residents.<sup>6-8</sup> This most likely occurs because CPR training is significantly associated with increased confidence and willingness to provide CPR.<sup>9,10</sup> Existing data also suggests specific demographics are associated with CPR training, including age, education level, country of birth and occupation.<sup>9-11</sup>

There is also a need to examine the impact of socio-economic factors on rates of bystander CPR training, as regions with lower bystander CPR also have lower CPR training rates.<sup>12,13</sup> Therefore, understanding current rates of CPR training in the community is important, and may drive local initiatives.

In Australia, CPR training is currently not mandatory, and state-based surveys<sup>9,14-16</sup> suggest that less than 60% of Australian adults have received CPR training at least once. However, these surveys were conducted in specific regions, and most more than a decade ago. This study aimed to provide the first Australian-wide estimates of CPR training and willingness to learn CPR.

## METHODS

This cross-sectional study used data from the Heart Foundations of Australia's "HeartWatch" Survey. This quarterly survey is conducted using a purposive, non-probability sampling method with quotas for age, gender and area of residence, in order to reflect the characteristics of the wider Australian population. Respondents of the survey belong to an online survey panel. In July 2017, 21 questions

1  
2  
3 about CPR were added to the survey, generated from previous Australian surveys.<sup>9,14–16</sup> The CPR  
4 questions (Supplementary File 1) were in three sections: cardiac arrest knowledge; CPR knowledge  
5 and experience; and defibrillator knowledge.  
6  
7  
8

9  
10 The present study was granted an ethics exemption from Monash University Human Research Ethics  
11 Committee (Project Number: 12329) as data provided for the research by the Heart Foundation of  
12 Australia was de-identified.  
13  
14  
15

### 16 17 *Patient and Public Involvement*

18  
19 The public were not invited to comment on the design of this study and were not consulted to  
20 develop relevant outcomes or interpret the results. The research group (Australian and New Zealand  
21 Prehospital Emergency Care [PEC-ANZ] Centre of Research Excellence) do however have  
22 representatives from the public on the steering committee who will be consulted about the  
23 outcomes and directions of dissemination of this research during regularly scheduled meetings.  
24 Results will also be disseminated via Heart Foundation of Australia channels in addition to the  
25 research group.  
26  
27  
28  
29  
30  
31  
32  
33  
34  
35

### 36 37 *Data analysis*

38  
39 Data were analysed using descriptive statistics with proportions expressed as percentages and tests  
40 of association using chi-squared statistic between respondent characteristics and CPR training  
41 status. Logistic regression was used to identify respondent characteristics independently associated  
42 with CPR training. Characteristics with p-values <0.2 at the univariate level were included in the  
43 model. We also conducted a sensitivity analysis in a subsample of respondents excluding those who  
44 reported they had previously performed CPR. Free text responses were categorically coded by two  
45 health care professionals (Registered Nurse [SC] and Paramedic [DS]) in parallel, both of whom are  
46 experienced community first aid trainers. These authors met several times to compare and discuss  
47  
48  
49  
50  
51  
52  
53  
54  
55  
56  
57  
58  
59  
60

1  
2  
3 coding frameworks with outstanding disagreements referred to a third author (JB). Statistical  
4  
5 significance for quantitative analysis was set at  $p < 0.05$  and analysis was conducted with Stata V15.1.  
6  
7  
8  
9

## 10 11 **RESULTS**

12  
13  
14 The survey sample consisted of 1,076 Australian adults. Responses were received from every state  
15  
16 and territory in Australia (Table 1). There was a similar proportion of female (n=554, 50.6%) and  
17  
18 male (n=532, 49.4%) respondents. The majority were aged between 35 and 64 years (n = 443, 41%),  
19  
20 had completed at least 10 years of schooling (n = 968, 90%) and were born in Australia (n= 817,  
21  
22  
23 76%).  
24  
25  
26  
27  
28  
29  
30  
31  
32  
33  
34  
35  
36  
37  
38  
39  
40  
41  
42  
43  
44  
45  
46  
47  
48  
49  
50  
51  
52  
53  
54  
55  
56  
57  
58  
59  
60

**Table 1. Characteristics of the sample according to cardiopulmonary resuscitation training status**

|                         | Overall n = 1076 | CPR training status            |                                    |         |
|-------------------------|------------------|--------------------------------|------------------------------------|---------|
|                         |                  | CPR trained<br>n = 540 (55.7%) | Not CPR trained<br>n = 429 (44.3%) | p value |
| <b>Gender</b>           |                  |                                |                                    |         |
| Female                  | 544 (50.6%)      | 292 (54.1%)                    | 210 (48.9%)                        | 0.11    |
| Male                    | 532 (49.4%)      | 248 (45.9%)                    | 219 (51.1%)                        |         |
| <b>Age</b>              |                  |                                |                                    |         |
| 18 – 34                 | 114 (10.6%)      | 154 (28.5%)                    | 135 (31.4%)                        | 0.07    |
| 35-44                   | 220 (20.5%)      | 231 (42.8%)                    | 149 (34.7%)                        |         |
| 45-64                   | 223 (20.7%)      | 142 (26.3%)                    | 130 (30.3%)                        |         |
| 75+                     | 207 (19.2%)      | 13 (2.4%)                      | 15 (3.5%)                          |         |
| <b>Country of birth</b> |                  |                                |                                    |         |
| Australia               | 817 (75.9%)      | 431 (79.8%)                    | 311 (72.5%)                        | 0.03    |
| Overseas                | 253 (23.5%)      | 108 (20.0%)                    | 116 (27.0%)                        |         |
| Prefer not to answer    | 6 (0.6%)         | 1 (0.2%)                       | 2 (0.5%)                           |         |

1  
2  
3  
4  
5  
6  
7  
8  
9  
10  
11  
12  
13  
14  
15  
16  
17  
18  
19  
20  
21  
22  
23  
24  
25  
26  
27  
28  
29  
30  
31  
32  
33  
34  
35  
36  
37  
38  
39  
40  
41  
42  
43  
44  
45  
46**State**

|                                        |             |             |             |      |
|----------------------------------------|-------------|-------------|-------------|------|
| Australian Capital Territory           | 8 (0.7%)    | 4 (0.7%)    | 4 (0.9%)    | 0.83 |
| New South Wales and Northern Territory | 339 (31.5%) | 174 (32.2%) | 127 (29.6%) |      |
| Queensland                             | 218 (20.3%) | 111 (20.6%) | 92 (21.4%)  |      |
| South Australia                        | 85 (7.9%)   | 43 (8.0%)   | 33 (7.7%)   |      |
| Tasmania                               | 24 (2.2%)   | 16 (3.0%)   | 6 (1.4%)    |      |
| Victoria                               | 284 (26.4%) | 132 (24.4%) | 115 (26.8%) |      |
| Western Australia                      | 114 (10.6%) | 58 (10.7%)  | 44 (10.3%)  |      |

**Education**

|                         |             |             |             |        |
|-------------------------|-------------|-------------|-------------|--------|
| Primary or grade school | 3 (0.3%)    | 1 (0.2%)    | 2 (0.5%)    | <0.001 |
| Some high school        | 97 (9%)     | 41 (7.8%)   | 44 (10.3%)  |        |
| High school graduate    | 193 (17.9%) | 75 (13.9%)  | 104 (24.2%) |        |
| Technical college       | 302 (28.1%) | 179 (33.2%) | 102 (23.8%) |        |
| University diploma      | 332 (30.9%) | 161 (29.8%) | 133 (31.0%) |        |
| Postgraduate            | 141 (13.1%) | 78 (14.4%)  | 43 (10.0%)  |        |



1  
2  
3  
4  
5  
6  
7  
8  
9  
10  
11  
12  
13  
14  
15  
16  
17  
18  
19  
20  
21  
22  
23  
24  
25  
26  
27  
28  
29  
30  
31  
32  
33  
34  
35  
36  
37  
38  
39  
40  
41  
42  
43  
44  
45  
46

|                                           |                  |                   |                  |                   |
|-------------------------------------------|------------------|-------------------|------------------|-------------------|
| Prefer not to answer                      | 8 (0.8%)         | 5 (0.9%)          | 2 (0.5%)         |                   |
| <b>Previously performed emergency CPR</b> | <b>95 (8.8%)</b> | <b>84 (15.5%)</b> | <b>11 (2.6%)</b> | <b>&lt;0.0001</b> |

For peer review only

### *Cardiac arrest knowledge*

Respondents were asked if they “knew the difference between a cardiac arrest and a heart attack”.

The majority of respondents stated they were “unsure” (n = 404, 37.6%), followed by “yes” (n = 356, 33.1%), with the remaining responding “no” (n=316, 29.4%). The majority of those responding “yes” had received CPR training (72%). Those who answered “yes” were then asked to describe the difference between the two conditions using free text. Less than half of the “yes” respondents identified the two conditions correctly (n = 174, 48.3%), however 22.2% (n=79) identified the conditions incorrectly or only had the definitions partially correct (n=66, 18.5%). A small proportion (n=37, 10.4%) of yes respondents declared they were unsure once asked for a definition. When coding free text descriptions of the conditions it was noted that several respondents (n=10, 2.8%) had used the exact same wording. This wording was identical to the top result from online search engine Google when pasting the question into a search.

Knowledge of signs of cardiac arrest were variable among respondents. When coding free text responses according to Australian Resuscitation Council criteria (unresponsive and not breathing normally)<sup>17</sup>, only 2.9% (n = 32) of respondents answered correctly. However, many respondents described the absence of a pulse (“no heart beat”, “heart stops”), which has been removed within the last decade as a criteria for cardiac arrest in accredited Australian CPR training and from emergency call dispatch CPR instructions.<sup>4</sup> When we added the absence of a pulse as a correct descriptor of cardiac arrest, 14.2% (n = 153) of respondents had the answer coded as correct. Commonly respondents described a cardiac arrest victim as either unconscious or having an absence of breathing (n = 97, 9%). Incorrect answers (n = 684, 63.6%) featured chest pain, shortness of breath, weakness and dizziness. Numerous (11.8%) respondents (n = 127) stated they were unsure of the signs and symptoms.

### *CPR knowledge, confidence and training preferences*

1  
2  
3 The majority of respondents (n=969, 90.1%) had heard of CPR. Few respondents (n = 95, 8.8%) had  
4 previously performed CPR. When respondents were asked what they would do if someone was in  
5 cardiac arrest, only 9 (0.8%) respondents correctly identified the chain of survival<sup>18</sup> sequence of  
6 calling an ambulance, commencing CPR and applying a defibrillator. These respondents all had prior  
7 CPR training within five years. More respondents (n=141, 13%) were able to identify two correct  
8 actions (i.e. calling an ambulance, and CPR or defibrillation). A smaller proportion (n = 121, 11.2%)  
9 described CPR and or defibrillation but did not mention calling an ambulance. The majority of  
10 respondents (n = 536, 49.7%) responded they would call an ambulance, but did not describe any  
11 further actions.  
12

13  
14 In total 55.7% (n = 540) of respondents had undertaken CPR training previously, however a large  
15 proportion (42.5%, n = 412) had not, and a small proportion were unsure (n = 17, 1.8%,) or did not  
16 answer (n = 107, 9.9%) (Figure 1). The majority of CPR trained respondents had not been trained in  
17 CPR for over 5 years (n = 227, 42%), with only 21.7% (n = 117) classified as being currently trained  
18 (within 12 months) as per the Australian guidelines.<sup>19</sup> (Figure 2).  
19

20  
21 <Figure 1: Proportion (%) of sample who have "ever had" cardiopulmonary resuscitation training>  
22

23  
24 <Figure 2: Of those with cardiopulmonary resuscitation training, years since last training  
25 completed  
26

27  
28 CPR training was not associated with any region (state or territory) of residence (Table 2) or  
29 socioeconomic status (all deciles p>0.05, data not shown). However, CPR training was associated  
30 with age 35-54 years (odds ratio [OR] 1.45, 95% CI 1.06 - 2.00), Australian-born (OR 1.59, 95% CI 1.17  
31 – 2.17), and university (OR 1.86, 95% CI 1.35 – 2.57) and vocational level of education (OR 2.33, 95%  
32 CI 1.64 – 3.30) (Table 2). These factors remained significant when restricted to those who had not  
33 previously performed CPR. The main barriers to learning CPR included lack of awareness ("never  
34 thought about it") (n = 190, 44%), not knowing where to go to learn (n = 91, 21%) and cost (12%).  
35  
36  
37  
38  
39  
40  
41  
42  
43  
44  
45  
46  
47  
48  
49  
50  
51  
52  
53  
54  
55  
56  
57  
58  
59  
60

1  
2  
3 The relationship between confidence in ability to provide CPR was significantly related to CPR  
4 training status, with respondents who stated they were very confident to perform CPR more likely to  
5 have CPR training ( $p < 0.001$  (Figure 3)).  
6  
7  
8  
9

10 Of those with no prior CPR training, the majority ( $n = 312, 72.7\%$ ) of respondents were willing to  
11 learn CPR. The preferred format for CPR training was for group learning, led by a professional  
12 provider ( $n = 237, 76.0\%$ ) with a smaller proportion choosing learning via self-instruction ( $n = 57,$   
13  
14  
15  
16  
17 18.3%).  
18  
19  
20  
21  
22  
23  
24  
25  
26  
27  
28  
29  
30  
31  
32  
33  
34  
35  
36  
37  
38  
39  
40  
41  
42  
43  
44  
45  
46  
47  
48  
49  
50  
51  
52  
53  
54  
55  
56  
57  
58  
59  
60

For peer review only

**Table 2.** Factors associated with CPR training.

|                     | OR (95% CI)      | p-value |
|---------------------|------------------|---------|
| Females             | 1.30 (0.99-1.70) | 0.05    |
| Age                 |                  |         |
| 18-34               | Ref              |         |
| 35-54               | 1.45 (1.06-2.00) | 0.02    |
| 55-74               | 1.11 (0.78-1.58) | 0.55    |
| >75                 | 0.92 (0.42-2.06) | 0.85    |
| Australian born     | 1.59 (1.17-2.17) | 0.003   |
| Education           |                  |         |
| High school or less | Ref              |         |
| Vocational college  | 2.33 (1.64-3.30) | <0.001  |
| University          | 1.86 (1.35-2.57) | <0.001  |

<Figure 3. Self-rated confidence levels (%) about ability to perform effective CPR in an emergency according to CPR training status.>

### *Barriers to performing CPR*

Only half (n = 530, 49.3%) of respondents stated they would provide CPR to a stranger. The remaining respondents were predominantly unsure (n = 307, 28.5%). In those that responded no (n = 132, 12.3%) the most common response was not being trained in CPR (n = 57, 43.2%) or not feeling confident (n = 26, 19.7%). Fear (n = 9, 6.8%), a physical inability (n = 5, 3.8%), or concern over legalities (n = 5, 3.9%) were other factors mentioned, with only two (1.5%) mentioning fear of infection.

Of the respondents who were not CPR trained (n = 412), the majority stated they were willing to learn (n = 312, 75.7%), with only small proportion of respondents stating they were unsure (n = 74, 17.9%) or unwilling (n = 26, 6.3%).

### *Defibrillator knowledge (confidence, willingness)*

The majority of respondents (n = 903, 83.9%) had heard of a defibrillator and of these respondents more than half (n = 633, 58.8%) would be willing to use it. However confidence levels to use a defibrillator were low, with a third (33.9%, n = 215) stating they were not confident. ( Supplementary File 2).

## **DISCUSSION**

In this Australia-wide study, just over half (56%) of the adults reported having ever undertaken CPR training, however only 21% had current (within one year) training. CPR training was associated with younger age (35 – 54 years), being born in Australia and having a higher level of education. The association between these demographics and CPR training are similar to studies conducted in other countries.<sup>9–11</sup> Alarming however, this study found a low understanding of cardiac arrest, or being able to identify the actions involved with the chain of survival. There is a large opportunity to

1  
2  
3 increase national training prevalence, as the majority of those who were untrained in CPR are willing  
4 to learn and identified that learning in a group class, led by a professional instructor was the  
5 preferred learning format.  
6  
7  
8  
9

10 The prevalence of CPR training in this Australian study are similar to other recent international  
11 surveys conducted in the United Kingdom (57%)<sup>10</sup> and the United States of America (65%).<sup>11</sup> Unlike  
12 these countries however, Australia has no national or state-based mandatory training strategy, and  
13 there has only been limited attempts to promote awareness of cardiac arrest and CPR via mass-  
14 media (e.g. Shock Verdict <https://www.utas.edu.au/shockverdict>). These strategies are important to  
15 increase cardiac arrest and CPR training knowledge and awareness and should be considered.  
16  
17  
18  
19  
20  
21  
22  
23

24 In Australia, CPR training is only mandatory for selected professions (i.e. Health care professionals,  
25 teachers, childcare workers and fitness instructors).<sup>20</sup> The effect of workplace training is likely  
26 evidenced in our results by the fact younger working ages (35 – 54 years, OR 1.45, 95% CI 1.06 –  
27 2.00) and those who attended both vocational college (OR 2.33, 95% CI 1.64-3.30) and university (OR  
28 1.86, 95% CI 1.35-2.57) were independently associated with CPR training. Recent evidence from the  
29 USA<sup>21</sup> demonstrates that mandatory CPR training in schools is associated with higher levels of  
30 individuals who are currently trained in CPR. Mandatory community-level training strategies require  
31 cooperation from many parties including federal and state governments and Resuscitation Councils.  
32  
33  
34  
35  
36  
37  
38  
39  
40  
41  
42  
43  
44  
45  
46  
47  
48  
49  
50  
51  
52  
53  
54  
55  
56  
57  
58  
59  
60

Our results, as has been identified before,<sup>10,22,23</sup> also demonstrate that those with CPR training had  
higher levels of self-reported confidence to perform CPR and use a defibrillator. Concurrently, the  
most common barrier to not performing CPR in this study was not being trained. This highlights the  
importance of CPR training especially given the positive link between levels of training and bystander  
CPR rates.<sup>6–8</sup> CPR training is consistently related to younger age and higher levels of education both

1  
2  
3 in Australia<sup>9,14</sup> and internationally.<sup>11</sup> Future training initiatives need to consider targeting populations  
4 less likely to receive training, particularly those that are older, who are at higher risk of future  
5 cardiac events. Along with the International Liaison Committee on Resuscitation,<sup>24</sup> we also place  
6 value on training high-risk populations, such as households containing a person with heart disease  
7 and have success in piloting a targeted training program through cardiac rehabilitation programs.<sup>25</sup>

8  
9  
10 In addition to training, raising awareness of cardiac arrest and CPR training is essential. A significant  
11 proportion of respondents in our study had never thought about CPR training or didn't know where  
12 to go to receive training. A national and co-ordinated campaign to increase public awareness of  
13 cardiac arrest and CPR training is warranted given the low rates of knowledge assessed in this study.  
14 Highlighting the simplification of CPR through promoting hand-only CPR may encourage more  
15 people to render assistance in an emergency and to undertake training. As traditional television,  
16 radio and print mass media campaigns are very costly, dissemination of these messages via social  
17 media should be investigated.<sup>26</sup> These approaches could be successful now that smartphones and  
18 other digital mobile devices are almost ubiquitous in Australia, including among older Australians.<sup>27</sup>

19  
20  
21 In the modern era, CPR training can be provided in many formats (e.g. with an instructor, via self-  
22 instruction, online). The majority of respondents in our study stated they would prefer to learn from  
23 an instructor in a class, with a smaller proportion preferring self-instruction. Now that "hands-only"  
24 CPR is the preferred teaching method for lay people,<sup>17</sup> the simplified algorithm has the benefits of  
25 being appropriate for all levels of literacy and education, in addition to decreasing barriers to  
26 performing CPR (such as mouth-to-mouth ventilations).<sup>9,28</sup>

27  
28  
29 Our study is subject to a number of potential limitations. Firstly, the online survey may be subject to  
30 selection bias and the results may only be applicable to those who respond to online surveys.

31  
32  
33 However, the rationale of the sampling method used was to generate a sample which matched the  
34 characteristics (ie. age, sex, nationality) of the underlying Australian population. Secondly, the survey  
35 questions were not formally validated. It is therefore possible that some respondents may not have  
36  
37  
38  
39  
40  
41  
42  
43  
44  
45  
46  
47  
48  
49  
50  
51  
52  
53  
54  
55  
56  
57  
58  
59  
60



1  
2  
3 understood some of the questions or terms such as cardiac arrest. We also acknowledge that survey  
4 methodology is subject to recall bias. However, our results are consistent with previous  
5  
6 Australian<sup>14,15</sup> and international research.<sup>10,11</sup> Thirdly, the survey was restricted to those who could  
7  
8 read and respond in English. Additionally, future online survey's need to be aware that some  
9  
10 participants will undertake an online search to answer questions. In our case, we saw ten identical  
11  
12 answers to one question and upon further examination determined these had been copied and  
13  
14 pasted from the top search result of Google. Future online surveys could supplement responses  
15  
16 using other methods such as a phone survey to address this issue.  
17  
18  
19  
20

## 21 **Conclusion**

22  
23 Our data suggest CPR training rates in Australia are unchanged over the past decades, however the  
24  
25 majority of untrained respondents were willing to learn. This willingness should be leveraged  
26  
27 through national training and awareness strategies to increase knowledge of cardiac arrest and CPR.  
28  
29 Such strategies need to consider targeting training to men, those with lower levels of education and  
30  
31 those born overseas.  
32  
33  
34  
35  
36  
37  
38  
39

## 40 **Funding statement**

41  
42 Associate Professor Bray was funded by a Heart Foundation Fellowship (No. 101171). The study was  
43  
44 also supported by the National Health and Medical Research Council (NHMRC) funded Australian  
45  
46 and New Zealand Prehospital Emergency Care (PEC-ANZ) Centre of Research Excellence (No.  
47  
48 1116453).  
49  
50  
51  
52  
53  
54

## 55 **Competing interests**

56  
57 All authors have completed the ICMJE uniform disclosure form. No competing interests to declare.  
58  
59  
60

**Authors contributions**

SC and JB led the data analysis and drafted the paper. DS contributed to data analysis. All authors (SC, JB, DS and JF) contributed to critical revisions of the paper.

**Data sharing statement**

No additional data are available as data are owned by the National Heart Foundation of Australia.

For peer review only

## References

1. Sasson C, Rogers MAM, Dahl J, Kellermann AL. Predictors of survival from out-of-hospital cardiac arrest: a systematic review and meta-analysis. *Circulation Cardiovascular quality and outcomes*. 2010;3(1):63–81.
2. Hasselqvist-Ax I, Riva G, Herlitz J, Rosenqvist M, Hollenberg J, Nordberg P, et al. Early Cardiopulmonary Resuscitation in Out-of-Hospital Cardiac Arrest. *New England Journal of Medicine*. 2015 Jun 11;372(24):2307–15.
3. Beck B, Bray J, Cameron P, Smith K, Walker T, Grantham H, et al. Regional variation in the characteristics, incidence and outcomes of out-of-hospital cardiac arrest in Australia and New Zealand: results from the Aus-ROC Epistry. *Resuscitation*. 2018;126:49–57.
4. Bray JE, Deasy C, Walsh J, Bacon A, Currell A, Smith K. Changing EMS dispatcher CPR instructions to 400 compressions before mouth-to-mouth improved bystander CPR rates. *Resuscitation*. 2011 Nov;82(11):1393–8.
5. Case R, Cartledge S, Siedenburg J, Smith K, Straney L, Barger B, et al. Identifying barriers to the provision of bystander cardiopulmonary resuscitation (CPR) in high-risk regions: A qualitative review of emergency calls. *Resuscitation*. 2018;129:43–47.
6. Bray JE, Straney L, Smith K, Cartledge S, Case R, Bernard S, et al. Regions with low rates of bystander CPR have lower rates of CPR training in Victoria, Australia. *Journal of American Heart Association*. 2017;6:e005972.
7. Ro YS, Do Shin S, Song KJ, Hong SO, Kim YT, Lee D-W, et al. Public awareness and self-efficacy of cardiopulmonary resuscitation in communities and outcomes of out-of-hospital cardiac arrest: A multi-level analysis. *Resuscitation*. 2016;102:17–24.
8. Anderson ML, Cox M, Al - Khatib SM, Nichol G, Thomas KL, Chan PS, et al. Rates of cardiopulmonary resuscitation training in the United States.(Report). *JAMA Internal Medicine*. 2014;174(2):194.
9. Bray JE, Smith K, Case R, Cartledge S, Straney L, Finn J. Public cardiopulmonary resuscitation training rates and awareness of hands-only cardiopulmonary resuscitation: a cross-sectional survey of Victorians. *Emergency Medicine Australasia*. 2017;29(2):158–164.
10. Hawkes CA, Brown TP, Booth S, Fothergill RT, Siriwardena N, Zakaria S, et al. Attitudes to cardiopulmonary resuscitation and defibrillator use: a survey of UK adults in 2017. *Journal of the American Heart Association*. 2019;8(7):e008267.
11. Blewer AL, Ibrahim SA, Leary M, Dutwin D, McNally B, Anderson ML, et al. Cardiopulmonary Resuscitation Training Disparities in the United States. *Journal of the American Heart Association*. 2017 May 1;6(5):e006124.
12. Sasson C, Magid DJ, Chan P, Root ED, McNally BF, Kellermann AL, et al. Association of neighborhood characteristics with bystander-initiated CPR. *The New England journal of medicine*. 2012;367(17):1607–15.
13. Vaillancourt C, Lui A, De Maio VJ, Wells GA, Stiell IG. Socioeconomic status influences bystander CPR and survival rates for out-of-hospital cardiac arrest victims. *RESUSCITATION*. 2008;79(3).

14. Smith KL, Cameron PA, Meyer ADM, McNeil JJ. Is the public equipped to act in out of hospital cardiac emergencies? *Emergency Medicine Journal*. 2003 Jan 1;20(1):85–7.
15. Jelinek GA, Gennat H, Celenza T, O'Brien D, Jacobs I, Lynch D. Community attitudes towards performing cardiopulmonary resuscitation in Western Australia. *Resuscitation*. 2001 Dec;51(3):239–46.
16. Johnston TC, Clark MJ, Dingle GA, FitzGerald G. Factors influencing Queenslanders' willingness to perform bystander cardiopulmonary resuscitation. *Resuscitation*. 2003 Jan;56(1):67–75.
17. Australian and New Zealand Committee on Resuscitation. ANZCOR Guideline 8, cardiopulmonary resuscitation [Internet]. 2016 [cited 2016 Nov 14] p. 1–5. Report No.: Section 8, Cardiopulmonary resuscitation. Available from: <https://resus.org.au/guidelines/>
18. Cummins R, Ornato J, Thies W, Pepe P, Billi J, Seidel J, et al. Improving survival from sudden cardiac-arrest - the chain of survival concept - a statement for health-professionals from the advanced cardiac life-support subcommittee and the emergency cardiac care committee, American-Heart-Association. *Circulation*. 1991;83:1832–47.
19. Australian and New Zealand Committee on Resuscitation. ANZCOR Guideline 10.1, basic life support training [Internet]. 2016 [cited 2016 Nov 14] p. 1–5. Report No.: Section 8, Cardiopulmonary resuscitation. Available from: <https://resus.org.au/guidelines/>
20. Safe Work Australia. Safe Work Australia First Aid [Internet]. Canberra, Australia; 2018 Sep [cited 2019 Jun 29] p. 1–28. Available from: <https://www.safeworkaustralia.gov.au/first-aid>
21. Alexander TD, McGovern SK, Leary M, Abella BS, Blewer AL. Association of state-level CPR training initiatives with layperson CPR knowledge in the United States. *Resuscitation*. 2019 Jul 1;140:9–15.
22. Gräsner J-T, Lefering R, Koster RW, Masterson S, Böttiger BW, Herlitz J, et al. EuReCa ONE 27 Nations, ONE Europe, ONE Registry: A prospective one month analysis of out-of-hospital cardiac arrest outcomes in 27 countries in Europe. *Resuscitation*. 2016 Aug;105:188–95.
23. Perkins GD, Travers AH, Berg RA, Castren M, Considine J, Escalante R, et al. Part 3: Adult basic life support and automated external defibrillation: 2015 International Consensus on Cardiopulmonary Resuscitation and Emergency Cardiovascular Care Science with Treatment Recommendations. *Resuscitation*. 2015 Oct;95:e43–69.
24. Finn JC, Bhanji F, Lockey A, Monsieurs K, Frengley R, Iwami T, et al. Part 8: Education, implementation, and teams: 2015 International Consensus on Cardiopulmonary Resuscitation and Emergency Cardiovascular Care Science with Treatment Recommendations. *Resuscitation*. 2015 Oct;95:e203–24.
25. Cartledge S, Finn J, Bray JE, Case R, Barker L, Missen D, et al. Incorporating cardiopulmonary resuscitation training into a cardiac rehabilitation programme: A feasibility study. *European Journal of Cardiovascular Nursing*. 2017;17(2):148–58.
26. Greif R, Lockey AS, Conaghan P, Lippert A, De Vries W, Monsieurs KG, et al. European resuscitation council guidelines for resuscitation 2015: section 10. Education and implementation of resuscitation. *Resuscitation*. 2015;95:288–301.

- 1  
2  
3 27. Deloitte. Mobile phone consumer survey 2015 - The Australian Cut [Internet]. Sydney; 2017  
4 [cited 2019 Apr 30] p. 1–51. Available from: [http://landing.deloitte.com.au/rs/761-IBL-](http://landing.deloitte.com.au/rs/761-IBL-328/images/tmt-mobile-consumer-survey-2017_pdf.pdf)  
5 [328/images/tmt-mobile-consumer-survey-2017\\_pdf.pdf](http://landing.deloitte.com.au/rs/761-IBL-328/images/tmt-mobile-consumer-survey-2017_pdf.pdf)  
6  
7  
8 28. Sasson C, Haukoos JS, Bond C, Rabe M, Colbert SH, King R, et al. Barriers and facilitators to  
9 learning and performing cardiopulmonary resuscitation in neighborhoods with low bystander  
10 cardiopulmonary resuscitation prevalence and high rates of cardiac arrest in Columbus, OH.  
11 *Circulation Cardiovascular Quality and Outcomes*. 2013 Sep 1;6(5):550–8.  
12  
13  
14  
15  
16  
17  
18  
19  
20  
21  
22  
23  
24  
25  
26  
27  
28  
29  
30  
31  
32  
33  
34  
35  
36  
37  
38  
39  
40  
41  
42  
43  
44  
45  
46  
47  
48  
49  
50  
51  
52  
53  
54  
55  
56  
57  
58  
59  
60

For peer review only

1  
2  
3  
4  
5  
6  
7  
8  
9  
10  
11  
12  
13  
14  
15  
16  
17  
18  
19  
20  
21  
22  
23  
24  
25  
26  
27  
28  
29  
30  
31  
32  
33  
34  
35  
36  
37  
38  
39  
40  
41  
42  
43  
44  
45  
46

For peer review only

1  
2  
3  
4  
5  
6  
7  
8  
9  
10  
11  
12  
13  
14  
15  
16  
17  
18  
19  
20  
21  
22  
23  
24  
25  
26  
27  
28  
29  
30  
31  
32  
33  
34  
35  
36  
37  
38  
39  
40  
41  
42  
43  
44  
45  
46

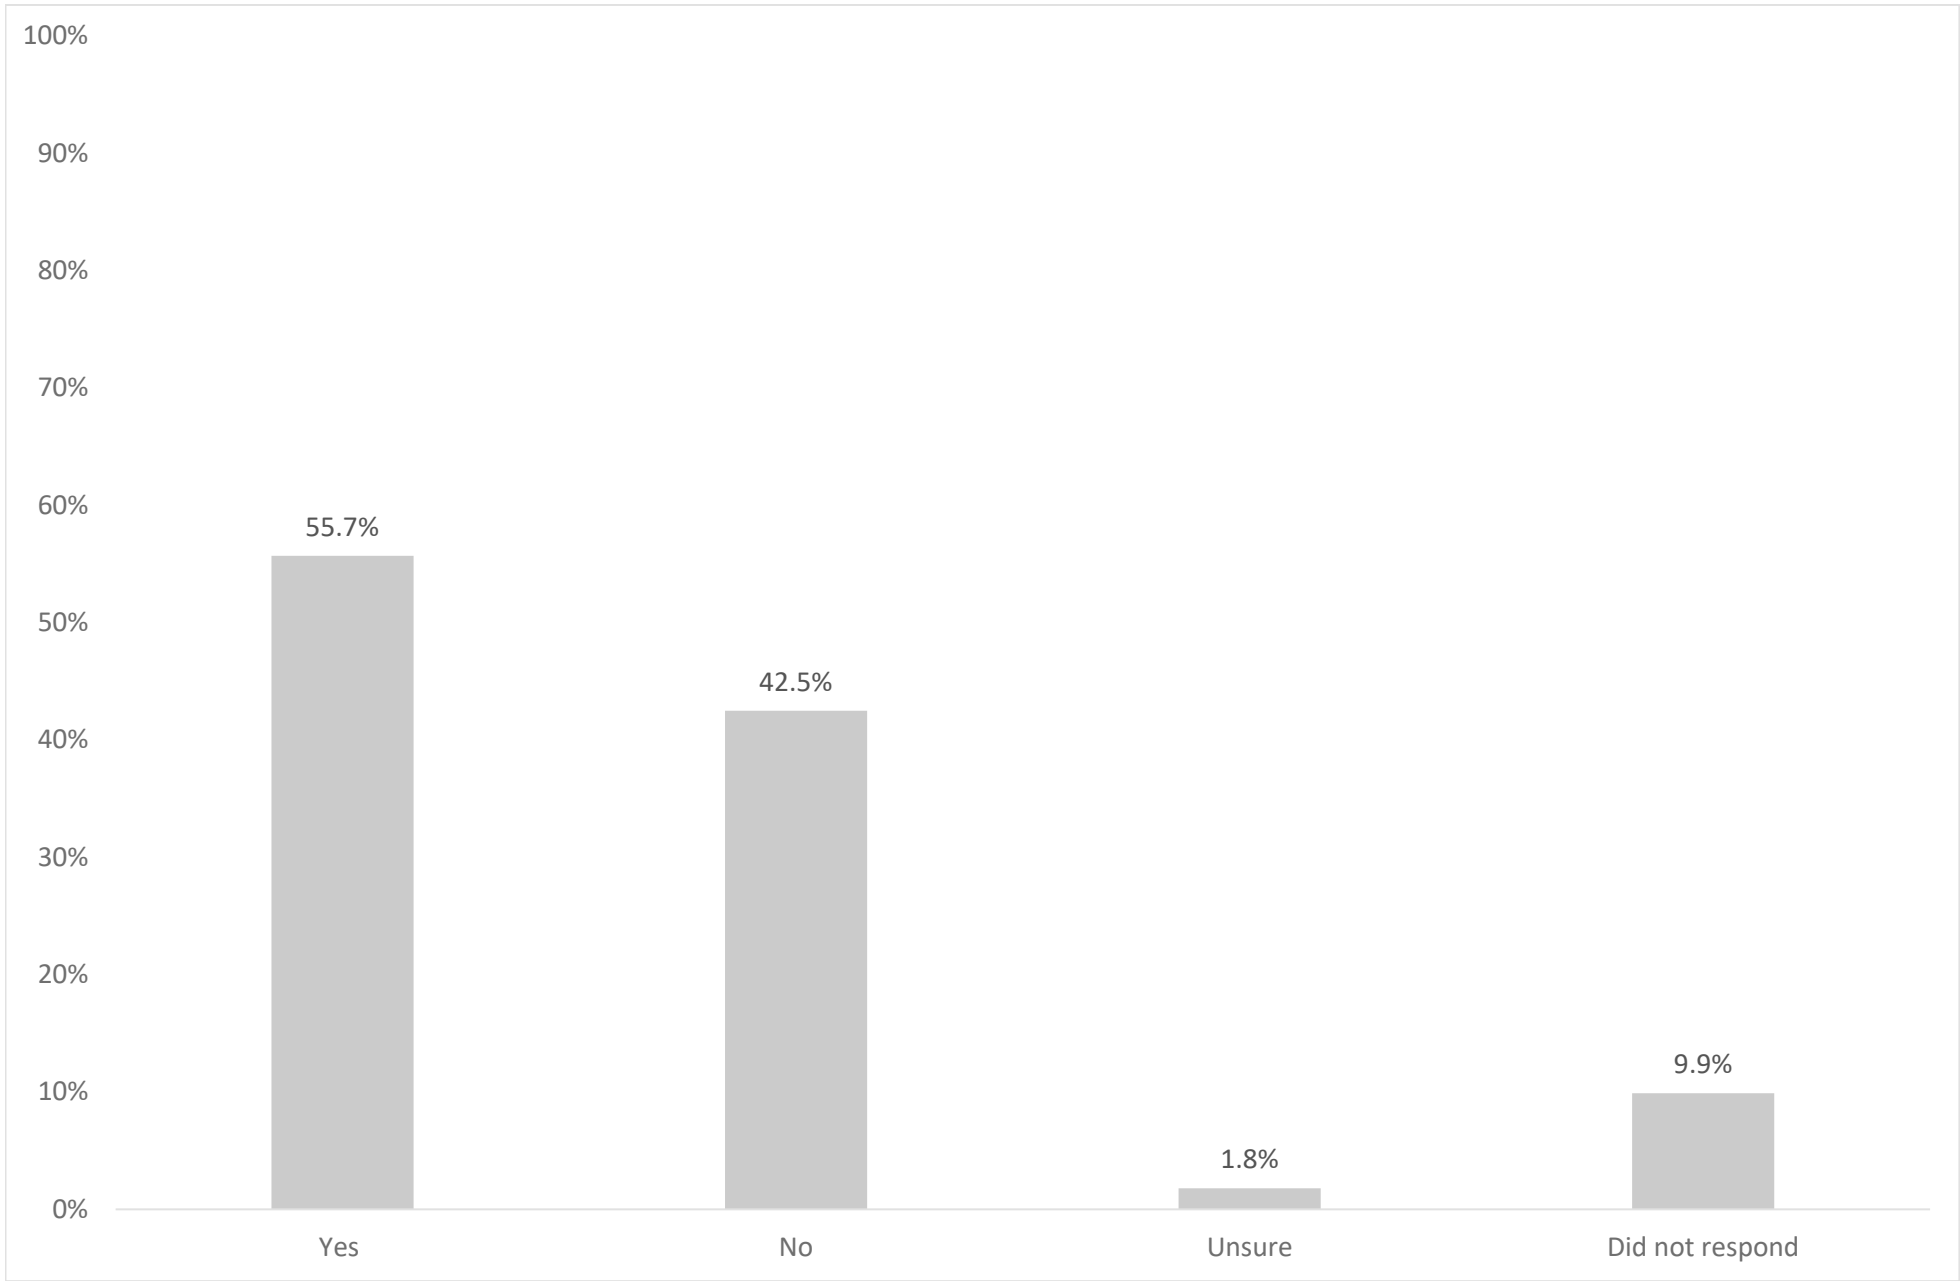

1  
2  
3  
4  
5  
6  
7  
8  
9  
10  
11  
12  
13  
14  
15  
16  
17  
18  
19  
20  
21  
22  
23  
24  
25  
26  
27  
28  
29  
30  
31  
32  
33  
34  
35  
36  
37  
38  
39  
40  
41  
42  
43  
44  
45  
46

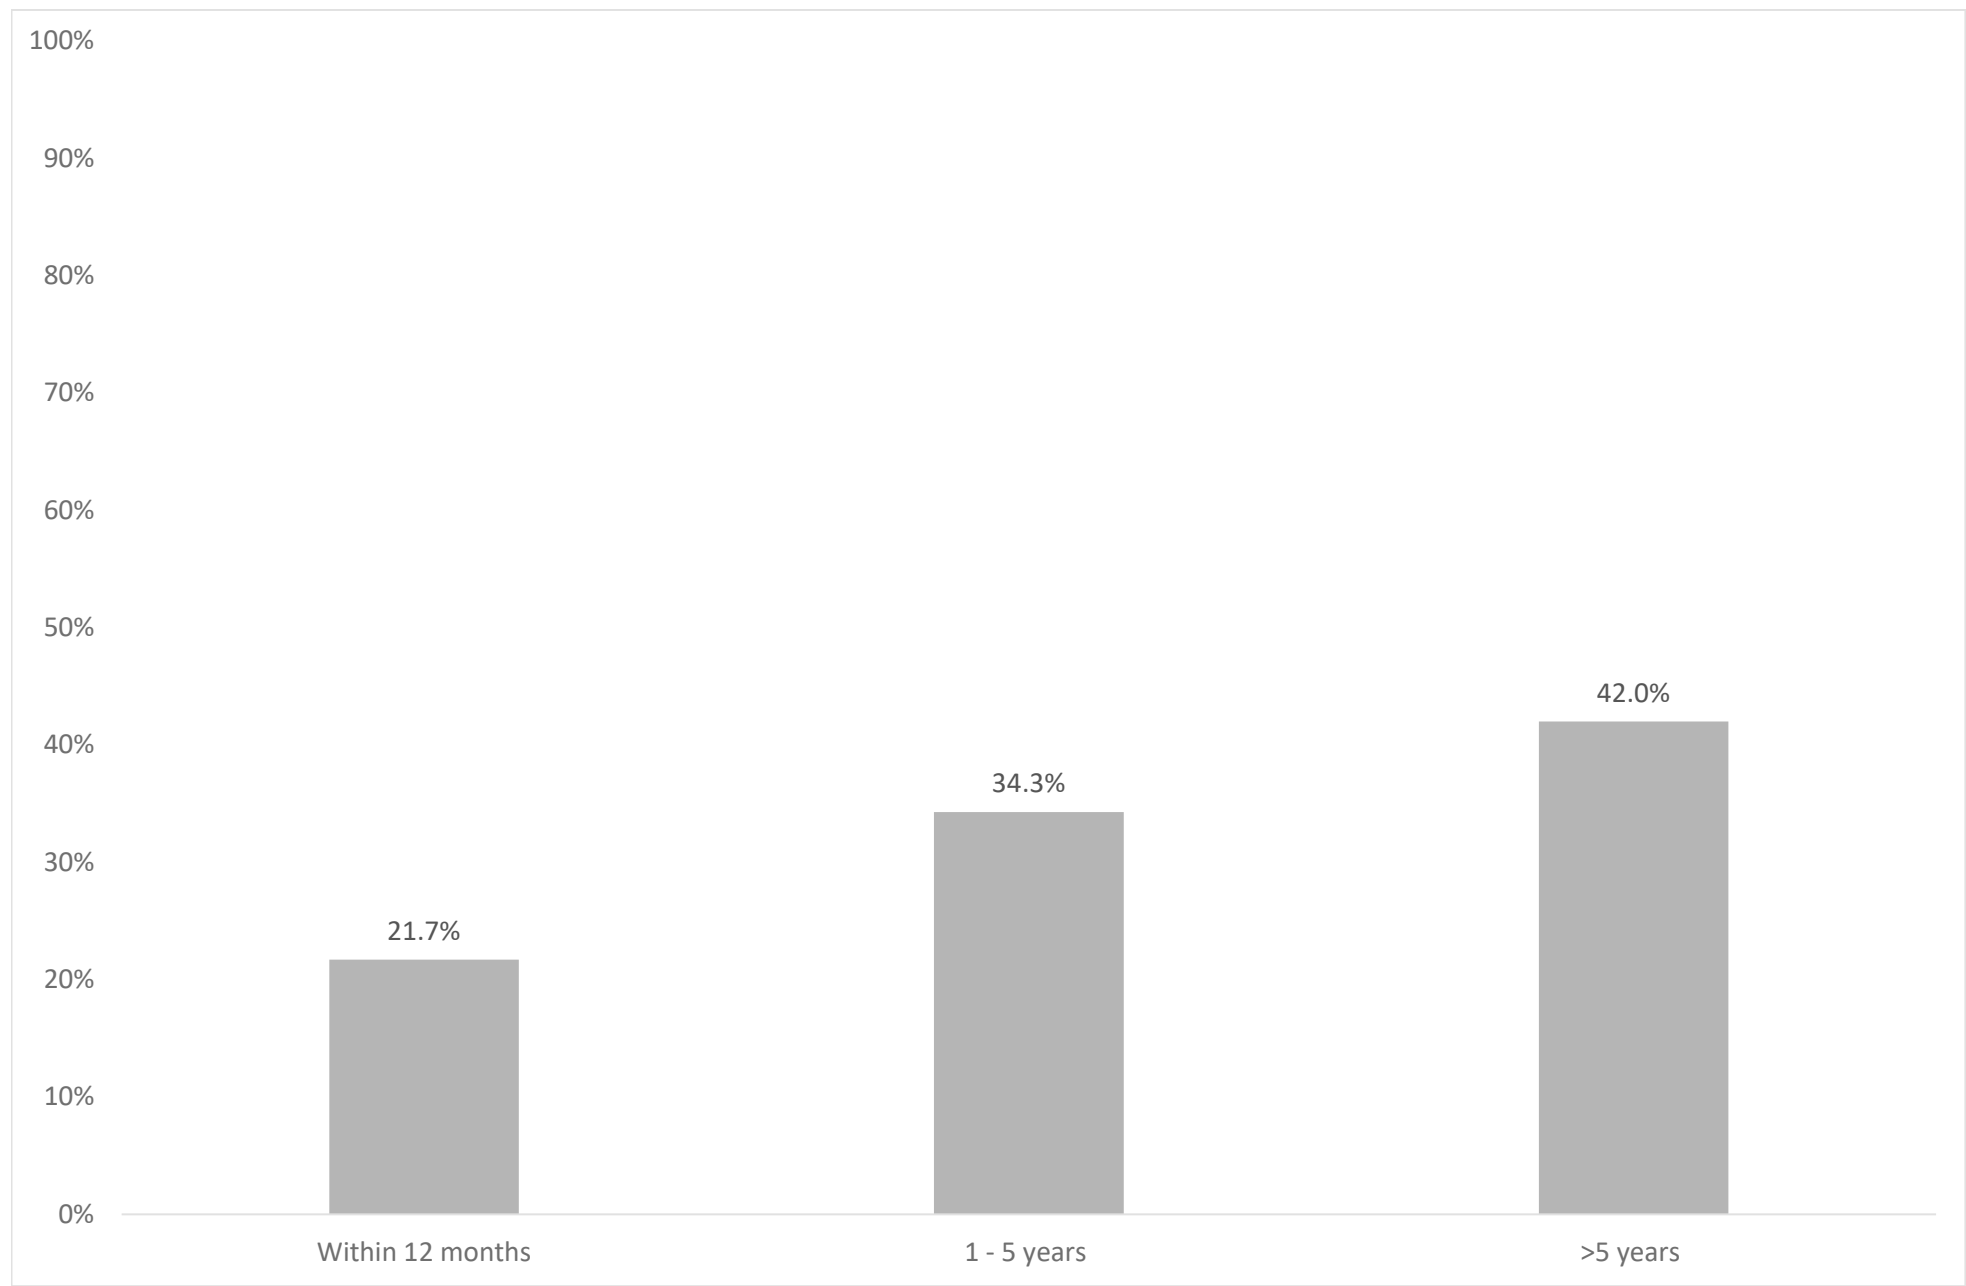



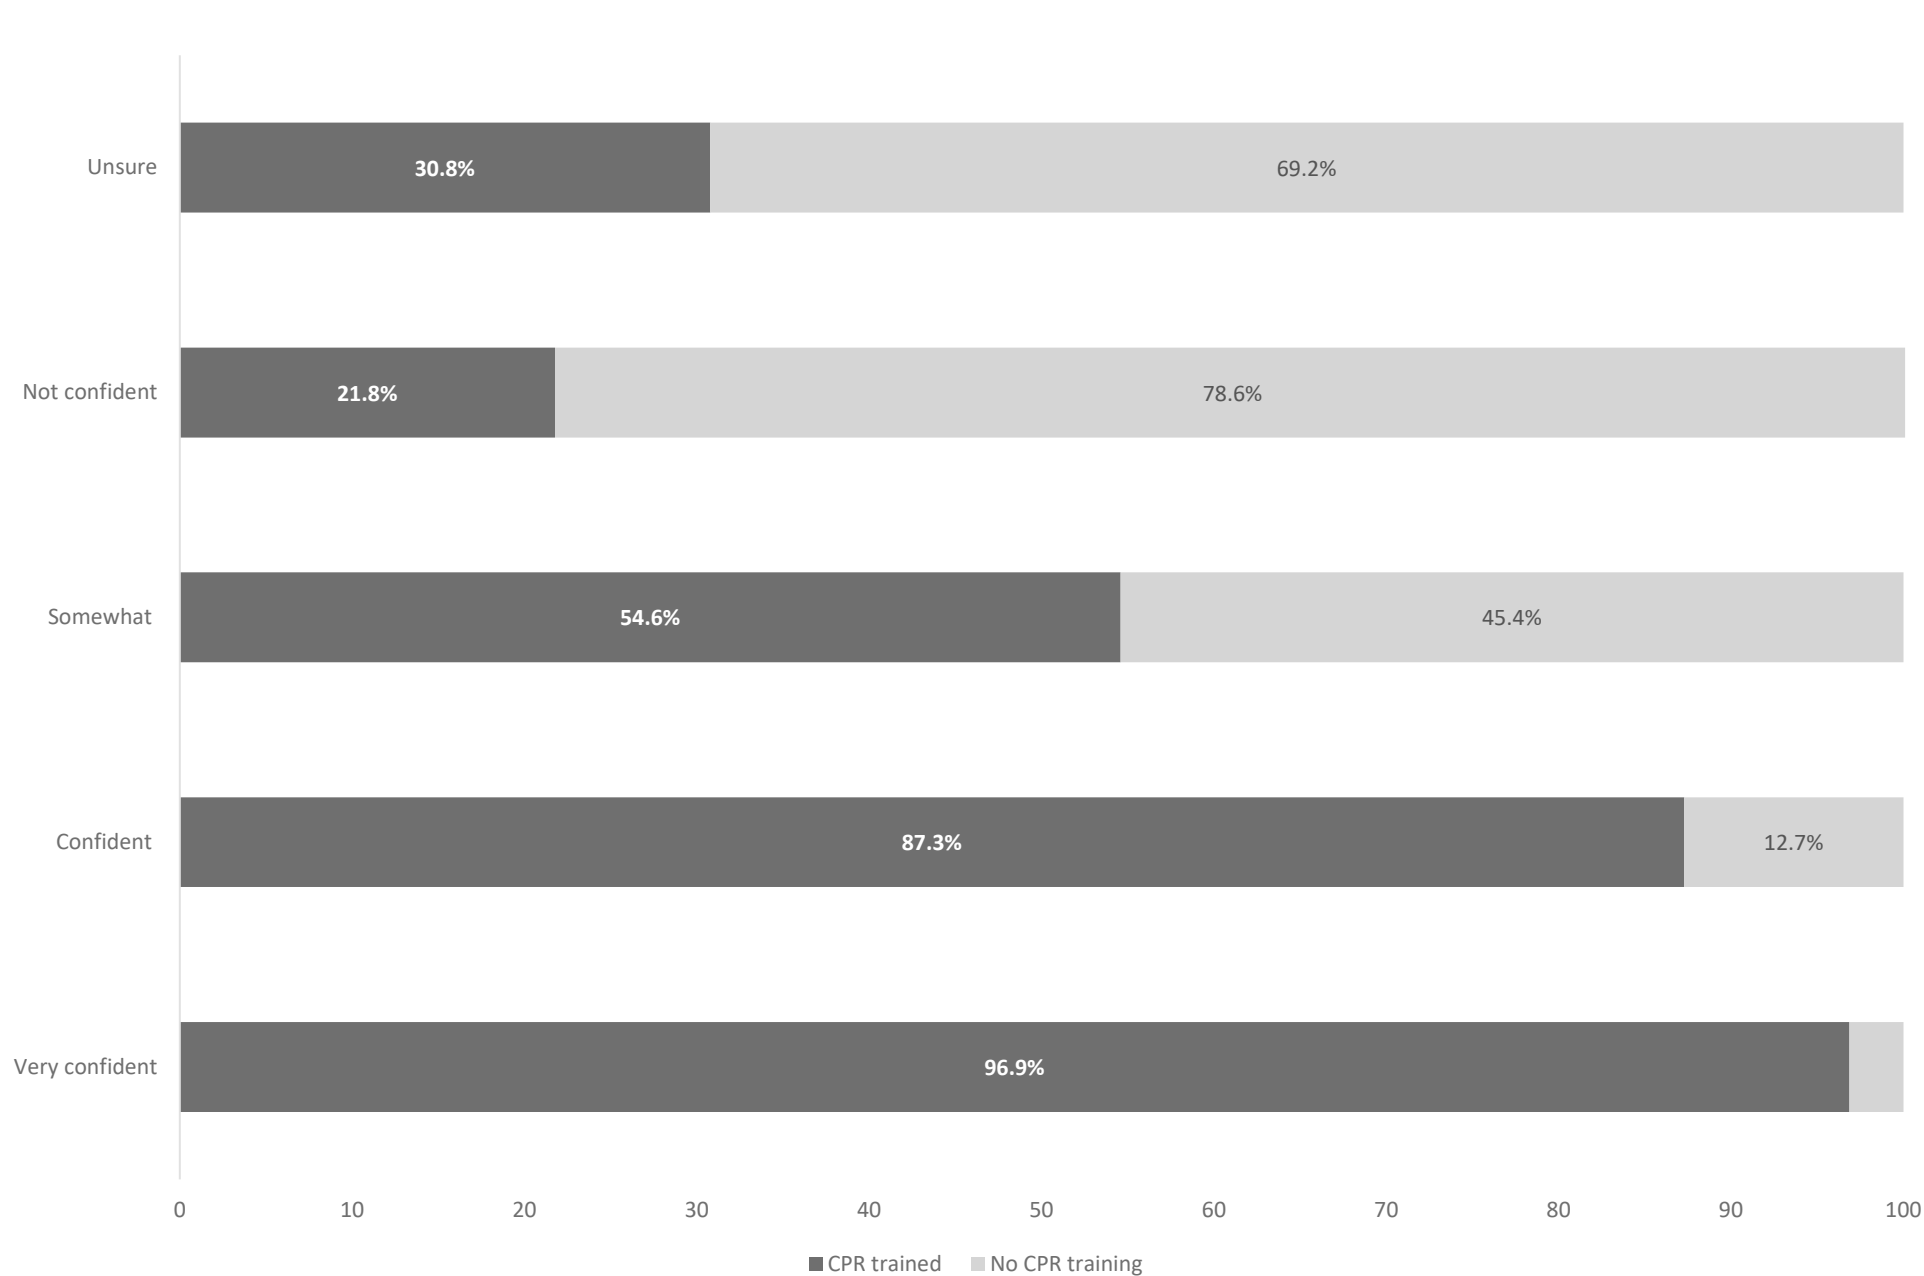

**Supplementary 1: CPR specific questions of HeartWatch Survey 2017**

1. To begin with could you please confirm your age?
2. What gender are you?
3. Where do you live?
4. What is your postcode?
5. Where you born in Australia or overseas?
6. What is the highest level of schooling you have received?
7. Do you know the difference between a cardiac arrest and a heart attack?
8. How would you describe the difference between a cardiac arrest and a heart attack?
9. What symptoms or signs would you associate with having a cardiac arrest?
10. What do you think you would do if you saw someone in cardiac arrest?
11. Have you ever heard of cardiopulmonary resuscitation, also known as CPR or mouth-to-mouth?
12. What is your understanding of when a person requires CPR?
13. Which of the following reflects how confident you currently feel about your ability to perform effective CPR in an emergency?
14. Have you ever performed CPR in a real-life emergency?
15. Would you intervene and provide CPR to a stranger?
16. Why would you not provide CPR?
17. Would you provide CPR to a family member or someone you know?
18. When a person has a cardiac arrest, CPR can more than double a person's chance of survival. Now knowing this, would you be more likely to provide CPR to a stranger?
19. Have you been trained in CPR?
20. How long ago did you receive the CPR training?

- 1  
2  
3 21. Which of these statements best describes your reasons for not receiving CPR  
4 training?  
5  
6  
7 22. Would you be willing to learn CPR?  
8  
9 23. Which format of learning CPR would you prefer?  
10  
11 24. Have you ever heard of a defibrillator?  
12  
13 25. Would you be willing to use a defibrillator to help someone in difficulty/in an  
14 emergency?  
15  
16 26. Which of the following reflects how confident you currently feel about using a  
17 defibrillator in an emergency?  
18  
19 27. Why would you not use a defibrillator to help someone in difficulty/in an  
20 emergency?  
21  
22 28. How long do you think someone will survive after a cardiac arrest without CPR or  
23 defibrillation?  
24  
25  
26  
27  
28  
29  
30  
31  
32  
33  
34  
35  
36  
37  
38  
39  
40  
41  
42  
43  
44  
45  
46  
47  
48  
49  
50  
51  
52  
53  
54  
55  
56  
57  
58  
59  
60

## Supplementary 2: Defibrillator knowledge

|                                                     | Overall n = 1076 | CPR training status            |                                    |
|-----------------------------------------------------|------------------|--------------------------------|------------------------------------|
|                                                     |                  | CPR trained<br>n = 540 (55.7%) | Not CPR trained<br>n = 429 (44.3%) |
| <b>Have you ever heard of a defibrillator?</b>      |                  |                                |                                    |
| Yes                                                 | 903 (83.9%)      | 511 (94.6%)                    | 392 (91.4%)                        |
| No                                                  | 127 (11.8%)      | 20 (3.7%)                      | 107 (24.9%)                        |
| Unsure                                              | 46 (4.3%)        | 9 (1.7%)                       | 37 (8.6%)                          |
| <b>Willingness to use a defibrillator</b>           |                  |                                |                                    |
| Yes                                                 | 633 (58.8%)      | 390 (72.2%)                    | 243 (56.6%)                        |
| No                                                  | 73 (6.8%)        | 27 (5.0%)                      | 46 (10.7%)                         |
| Unsure                                              | 197 (18.3%)      | 94 (17.4%)                     | 103 (24.0%)                        |
| <b>Self-rated confidence to use a defibrillator</b> |                  |                                |                                    |
| Very confident                                      | 85 (7.9%)        | 77 (14.3%)                     | 8 (1.9%)                           |
| Confident                                           | 137 (12.7%)      | 119 (22.0%)                    | 18 (4.2%)                          |
| Somewhat confident                                  | 187 (17.4%)      | 118 (21.9%)                    | 69 (16.1%)                         |
| Not confident                                       | 215 (20.0%)      | 73 (13.5%)                     | 142 (33.1%)                        |
| Unsure                                              | 9 (0.8%)         | 3 (0.6%)                       | 6 (1.4%)                           |

**STROBE 2007 (v4) Statement—Checklist of items that should be included in reports of *cross-sectional studies***

| Section/Topic                | Item # | Recommendation                                                                                                                                                                       | Reported on page #      |
|------------------------------|--------|--------------------------------------------------------------------------------------------------------------------------------------------------------------------------------------|-------------------------|
| <b>Title and abstract</b>    | 1      | (a) Indicate the study's design with a commonly used term in the title or the abstract                                                                                               | 2                       |
|                              |        | (b) Provide in the abstract an informative and balanced summary of what was done and what was found                                                                                  | 2                       |
| <b>Introduction</b>          |        |                                                                                                                                                                                      |                         |
| Background/rationale         | 2      | Explain the scientific background and rationale for the investigation being reported                                                                                                 | 4                       |
| Objectives                   | 3      | State specific objectives, including any prespecified hypotheses                                                                                                                     | 4                       |
| <b>Methods</b>               |        |                                                                                                                                                                                      |                         |
| Study design                 | 4      | Present key elements of study design early in the paper                                                                                                                              | 4 - 5                   |
| Setting                      | 5      | Describe the setting, locations, and relevant dates, including periods of recruitment, exposure, follow-up, and data collection                                                      | 4 - 5                   |
| Participants                 | 6      | (a) Give the eligibility criteria, and the sources and methods of selection of participants                                                                                          | 4 - 5                   |
| Variables                    | 7      | Clearly define all outcomes, exposures, predictors, potential confounders, and effect modifiers. Give diagnostic criteria, if applicable                                             | 5                       |
| Data sources/<br>measurement | 8*     | For each variable of interest, give sources of data and details of methods of assessment (measurement). Describe comparability of assessment methods if there is more than one group | NA                      |
| Bias                         | 9      | Describe any efforts to address potential sources of bias                                                                                                                            | NA                      |
| Study size                   | 10     | Explain how the study size was arrived at                                                                                                                                            | NA – secondary analysis |
| Quantitative variables       | 11     | Explain how quantitative variables were handled in the analyses. If applicable, describe which groupings were chosen and why                                                         |                         |
| Statistical methods          | 12     | (a) Describe all statistical methods, including those used to control for confounding                                                                                                | 5                       |
|                              |        | (b) Describe any methods used to examine subgroups and interactions                                                                                                                  | NA                      |
|                              |        | (c) Explain how missing data were addressed                                                                                                                                          | NA                      |
|                              |        | (d) If applicable, describe analytical methods taking account of sampling strategy                                                                                                   | NA                      |
|                              |        | (e) Describe any sensitivity analyses                                                                                                                                                | NA                      |

|                          |     |                                                                                                                                                                                                              |        |
|--------------------------|-----|--------------------------------------------------------------------------------------------------------------------------------------------------------------------------------------------------------------|--------|
| <b>Results</b>           |     |                                                                                                                                                                                                              |        |
| Participants             | 13* | (a) Report numbers of individuals at each stage of study—eg numbers potentially eligible, examined for eligibility, confirmed eligible, included in the study, completing follow-up, and analysed            | 5 - 6  |
|                          |     | (b) Give reasons for non-participation at each stage                                                                                                                                                         | NA     |
|                          |     | (c) Consider use of a flow diagram                                                                                                                                                                           | NA     |
| Descriptive data         | 14* | (a) Give characteristics of study participants (eg demographic, clinical, social) and information on exposures and potential confounders                                                                     | 5 - 6  |
|                          |     | (b) Indicate number of participants with missing data for each variable of interest                                                                                                                          | 5 - 8  |
| Outcome data             | 15* | Report numbers of outcome events or summary measures                                                                                                                                                         | 5 - 8  |
| Main results             | 16  | (a) Give unadjusted estimates and, if applicable, confounder-adjusted estimates and their precision (eg, 95% confidence interval). Make clear which confounders were adjusted for and why they were included | NA     |
|                          |     | (b) Report category boundaries when continuous variables were categorized                                                                                                                                    | NA     |
|                          |     | (c) If relevant, consider translating estimates of relative risk into absolute risk for a meaningful time period                                                                                             | NA     |
| Other analyses           | 17  | Report other analyses done—eg analyses of subgroups and interactions, and sensitivity analyses                                                                                                               | NA     |
| <b>Discussion</b>        |     |                                                                                                                                                                                                              |        |
| Key results              | 18  | Summarise key results with reference to study objectives                                                                                                                                                     | 9 – 11 |
| Limitations              | 19  | Discuss limitations of the study, taking into account sources of potential bias or imprecision. Discuss both direction and magnitude of any potential bias                                                   | 11     |
| Interpretation           | 20  | Give a cautious overall interpretation of results considering objectives, limitations, multiplicity of analyses, results from similar studies, and other relevant evidence                                   | 11     |
| Generalisability         | 21  | Discuss the generalisability (external validity) of the study results                                                                                                                                        | 11     |
| <b>Other information</b> |     |                                                                                                                                                                                                              |        |
| Funding                  | 22  | Give the source of funding and the role of the funders for the present study and, if applicable, for the original study on which the present article is based                                                | 11     |

\*Give information separately for cases and controls in case-control studies and, if applicable, for exposed and unexposed groups in cohort and cross-sectional studies.

**Note:** An Explanation and Elaboration article discusses each checklist item and gives methodological background and published examples of transparent reporting. The STROBE checklist is best used in conjunction with this article (freely available on the Web sites of PLoS Medicine at <http://www.plosmedicine.org/>, Annals of Internal Medicine at <http://www.annals.org/>, and Epidemiology at <http://www.epidem.com/>). Information on the STROBE Initiative is available at [www.strobe-statement.org](http://www.strobe-statement.org).
