# Supplementary material for: Australia’s awareness of cardiac arrest and rates of CPR training: results from the Heart Foundation's HeartWatch survey
Source: PubMed Central journal article supplement — BMJ Open. 2020 Jan 6;10(1):e033722. doi: 10.1136/bmjopen-2019-033722 (PMC6955479; doi:10.1136/bmjopen-2019-033722), 2020-01-06
Supplement: bmjopen-2019-033722supp001.pdf [file bmjopen-2019-033722supp001.pdf]

**Supplementary 1: CPR specific questions of HeartWatch Survey 2017**

1. To begin with could you please confirm your age?
2. What gender are you?
3. Where do you live?
4. What is your postcode?
5. Where you born in Australia or overseas?
6. What is the highest level of schooling you have received?
7. Do you know the difference between a cardiac arrest and a heart attack?
8. How would you describe the difference between a cardiac arrest and a heart attack?
9. What symptoms or signs would you associate with having a cardiac arrest?
10. What do you think you would do if you saw someone in cardiac arrest?
11. Have you ever heard of cardiopulmonary resuscitation, also known as CPR or mouth-to-mouth?
12. What is your understanding of when a person requires CPR?
13. Which of the following reflects how confident you currently feel about your ability to perform effective CPR in an emergency?
14. Have you ever performed CPR in a real-life emergency?
15. Would you intervene and provide CPR to a stranger?
16. Why would you not provide CPR?
17. Would you provide CPR to a family member or someone you know?
18. When a person has a cardiac arrest, CPR can more than double a person's chance of survival. Now knowing this, would you be more likely to provide CPR to a stranger?
19. Have you been trained in CPR?
20. How long ago did you receive the CPR training?

21. Which of these statements best describes your reasons for not receiving CPR training?
22. Would you be willing to learn CPR?
23. Which format of learning CPR would you prefer?
24. Have you ever heard of a defibrillator?
25. Would you be willing to use a defibrillator to help someone in difficulty/in an emergency?
26. Which of the following reflects how confident you currently feel about using a defibrillator in an emergency?
27. Why would you not use a defibrillator to help someone in difficulty/in an emergency?
28. How long do you think someone will survive after a cardiac arrest without CPR or defibrillation?
