# Supplementary material for: Australia’s awareness of cardiac arrest and rates of CPR training: results from the Heart Foundation's HeartWatch survey
Source: PubMed Central journal article supplement — BMJ Open. 2020 Jan 6;10(1):e033722. doi: 10.1136/bmjopen-2019-033722 (PMC6955479; doi:10.1136/bmjopen-2019-033722), 2020-01-06
Supplement: bmjopen-2019-033722supp002.pdf [file bmjopen-2019-033722supp002.pdf]

**Supplementary 2: Defibrillator knowledge**

|                                           | Overall n = 1076 | CPR training status            |                                    |
|-------------------------------------------|------------------|--------------------------------|------------------------------------|
|                                           |                  | CPR trained<br>n = 540 (55.7%) | Not CPR trained<br>n = 429 (44.3%) |
| <b>Have you ever heard of a</b>           |                  |                                |                                    |
| <b>defibrillator?</b>                     |                  |                                |                                    |
| Yes                                       | 903 (83.9%)      | 511 (94.6%)                    | 392 (91.4%)                        |
| No                                        | 127 (11.8%)      | 20 (3.7%)                      | 107 (24.9%)                        |
| Unsure                                    | 46 (4.3%)        | 9 (1.7%)                       | 37 (8.6%)                          |
| <b>Willingness to use a defibrillator</b> |                  |                                |                                    |
| Yes                                       | 633 (58.8%)      | 390 (72.2%)                    | 243 (56.6%)                        |
| No                                        | 73 (6.8%)        | 27 (5.0%)                      | 46 (10.7%)                         |
| Unsure                                    | 197 (18.3%)      | 94 (17.4%)                     | 103 (24.0%)                        |
| <b>Self-rated confidence to use a</b>     |                  |                                |                                    |
| <b>defibrillator</b>                      |                  |                                |                                    |
| Very confident                            | 85 (7.9%)        | 77 (14.3%)                     | 8 (1.9%)                           |
| Confident                                 | 137 (12.7%)      | 119 (22.0%)                    | 18 (4.2%)                          |
| Somewhat confident                        | 187 (17.4%)      | 118 (21.9%)                    | 69 (16.1%)                         |
| Not confident                             | 215 (20.0%)      | 73 (13.5%)                     | 142 (33.1%)                        |
| Unsure                                    | 9 (0.8%)         | 3 (0.6%)                       | 6 (1.4%)                           |
